# Supplementary material for: Theoretical study on the influence of ancillary and cyclometalated ligands on the electronic structures and optoelectronic properties of heteroleptic iridium(iii) complexes
Source: Royal Society of Chemistry journal article supplement (doi:10.1039/c2dt30342f), 2012-01-01
Supplement: c2dt30342f.pdf [file c2dt30342f.pdf]

Theoretical study on the influence of ancillary and cyclometalated  
ligands on the electronic structures and optoelectronic properties of  
heteroleptic iridium(III) complexes

Yuqi Liu,<sup>1</sup> Godefroid Gahungu,<sup>1</sup> Xiaobo Sun,<sup>2</sup> Juanjuan Su,<sup>1</sup> Xiaochun Qu,<sup>1</sup> Zhijian  
Wu<sup>1,\*</sup>

<sup>1</sup> State Key Laboratory of Rare Earth Resource Utilization, Changchun Institute of  
Applied Chemistry, Chinese Academy of Sciences, Changchun 130022, P. R. China

<sup>2</sup> Department of Applied Chemistry, Qingdao Agricultural University, Qingdao  
266109, P. R. China

**Table S1.** Optimized geometry parameters for the complex **3** at DFT/PBE0/LANL2DZ and DFT/B3LYP/LANL2DZ Levels respectively, together with the experimental data

|                    | S0<br>(PBE0) | S0<br>(B3LYP) | Exptl  | $\Delta$<br>(PBE0) | $\Delta$<br>(B3LYP) |
|--------------------|--------------|---------------|--------|--------------------|---------------------|
| Bond Length/Å      |              |               |        |                    |                     |
| Ir-N1              | 2.031        | 2.057         | 2.043  | 0.012              | -0.014              |
| Ir-N3              | 2.033        | 2.060         | 2.030  | -0.003             | -0.030              |
| Ir-C1              | 2.022        | 2.043         | 2.018  | -0.005             | -0.026              |
| Ir-C2              | 2.022        | 2.043         | 2.038  | 0.016              | -0.005              |
| Ir-S1              | 2.511        | 2.564         | 2.477  | -0.033             | -0.087              |
| Ir-S2              | 2.514        | 2.568         | 2.488  | -0.025             | -0.080              |
| Bond Angle/deg     |              |               |        |                    |                     |
| S1-Ir-S2           | 80.2         | 79.2          | 79.7   | -0.5               | 0.5                 |
| C2-Ir-N3           | 79.5         | 79.2          | 78.9   | -0.6               | -0.3                |
| C1-Ir-N1           | 79.5         | 79.3          | 79.5   | 0.0                | 0.2                 |
| S1-Ir-N1           | 96.7         | 96.7          | 98.8   | 2.2                | 2.2                 |
| S1-Ir-N3           | 90.4         | 90.5          | 89.8   | -0.6               | -0.7                |
| S1-Ir-C1           | 172.7        | 171.9         | 174.6  | 1.9                | 2.7                 |
| C1-Ir-C2           | 92.8         | 93.4          | 91.6   | -1.2               | -1.8                |
| N1-Ir-N3           | 170.7        | 170.6         | 169.0  | -1.7               | -1.6                |
| C2-Ir-S2           | 172.8        | 172.1         | 172.8  | 0.0                | 0.7                 |
| S1-P-S2            | 107.0        | 107.3         | 106.0  | -1.0               | -1.3                |
| O3-P-O4            | 94.2         | 94.1          | 95.2   | 1.0                | 1.1                 |
| P-O4-C4            | 119.6        | 121.0         | 121.5  | 1.9                | 0.5                 |
| P-O3-C6            | 120.6        | 121.7         | 124.7  | 4.1                | 3.0                 |
| Dihedral Angle/deg |              |               |        |                    |                     |
| C3-C4-O4-P         | 170.5        | 172.1         | 177.5  | 7.0                | 5.4                 |
| C5-C6-O3-P         | -105.0       | -109.1        | -102.3 | 2.7                | 6.8                 |

<sup>a</sup> Experimental data<sup>20</sup>

**Table S2.** Mulliken and NBO charge on different fragments of the complexes in the ground states

|           | Mulliken charge |                   |                   |                | NBO charge |                   |                   |                |
|-----------|-----------------|-------------------|-------------------|----------------|------------|-------------------|-------------------|----------------|
|           | Ir              | dox <sub>A</sub>  | dox <sub>B</sub>  | acac           | Ir         | dox <sub>A</sub>  | dox <sub>B</sub>  | acac           |
| <b>1a</b> | 1.143           | -0.411            | -0.411            | -0.321         | 0.388      | 0.004             | 0.004             | -0.396         |
|           | Ir              | fox <sub>A</sub>  | fox <sub>B</sub>  | C <sup>a</sup> | Ir         | fox <sub>A</sub>  | fox <sub>B</sub>  | C <sup>a</sup> |
| <b>1b</b> | 1.155           | -0.422            | -0.422            | -0.312         | 0.392      | -0.002            | -0.002            | -0.387         |
| <b>2</b>  | 0.517           | -0.396            | -0.396            | 0.276          | -0.131     | 0.016             | 0.016             | 0.099          |
| <b>3</b>  | 0.489           | -0.364            | -0.358            | 0.234          | -0.127     | 0.037             | 0.038             | 0.052          |
|           | Ir              | pypz <sub>1</sub> | pypz <sub>2</sub> | acac           | Ir         | pypz <sub>1</sub> | pypz <sub>2</sub> | acac           |
| <b>4a</b> | 1.229           | -0.491            | -0.482            | -0.257         | 0.670      | -0.223            | -0.177            | -0.270         |
| <b>4b</b> | 1.224           | -0.490            | -0.482            | -0.253         | 0.674      | -0.225            | -0.184            | -0.266         |
| <b>4c</b> | 1.234           | -0.496            | -0.487            | -0.252         | 0.674      | -0.226            | -0.184            | -0.265         |
|           | Ir              | bptz <sub>1</sub> | bptz <sub>2</sub> | acac           | Ir         | bptz <sub>1</sub> | bptz <sub>2</sub> | acac           |
| <b>5</b>  | 1.198           | -0.472            | -0.468            | -0.258         | 0.671      | -0.222            | -0.182            | -0.267         |

<sup>a</sup>C=acac(**1b**); Et<sub>2</sub>dtc(**2**); Et<sub>2</sub>ntp(**3**)

**Table S3.** Frontier molecular orbital energies (eV) and compositions (%) of different fragments in the ground state for complex **1a**

| MO         | Energy/eV | Composition(%) |                  |                  |      | Assign              |
|------------|-----------|----------------|------------------|------------------|------|---------------------|
|            |           | Ir             | dox <sub>A</sub> | dox <sub>B</sub> | acac |                     |
| L+10       | 1.37      | 84             | 7                | 7                | 3    | d(Ir)               |
| L+9        | 1.33      | 50             | 23               | 23               | 3    | d(Ir)+ $\pi^*(dox)$ |
| L+8        | 0.60      | 8              | 45               | 45               | 1    | $\pi^*(dox)$        |
| L+7        | 0.45      | 4              | 47               | 48               | 1    | $\pi^*(dox)$        |
| L+6        | -0.32     | 1              | 25               | 24               | 50   | $\pi^*(dox + acac)$ |
| L+5        | -0.33     | 0              | 50               | 50               | 0    | $\pi^*(dox)$        |
| L+4        | -0.34     | 1              | 26               | 26               | 47   | $\pi^*(dox + acac)$ |
| L+3        | -0.78     | 4              | 47               | 47               | 2    | $\pi^*(dox)$        |
| L+2        | -0.82     | 4              | 48               | 48               | 1    | $\pi^*(dox)$        |
| L+1        | -1.58     | 1              | 49               | 49               | 0    | $\pi^*(dox)$        |
| LUMO       | -1.64     | 1              | 50               | 50               | 0    | $\pi^*(dox)$        |
| <b>Gap</b> |           | <b>3.36</b>    |                  |                  |      |                     |
| HOMO       | -5.00     | 46             | 24               | 24               | 6    | d(Ir)+ $\pi(dox)$   |
| H-1        | -5.15     | 27             | 5                | 5                | 63   | d(Ir)+ $\pi(acac)$  |
| H-2        | -5.73     | 46             | 24               | 24               | 6    | d(Ir)+ $\pi(dox)$   |
| H-3        | -5.76     | 9              | 34               | 34               | 23   | $\pi(dox + acac)$   |
| H-4        | -6.17     | 6              | 32               | 32               | 31   | $\pi(dox + acac)$   |
| H-5        | -6.40     | 5              | 21               | 21               | 53   | $\pi(dox + acac)$   |
| H-6        | -6.42     | 31             | 32               | 32               | 5    | d(Ir)+ $\pi(dox)$   |
| H-7        | -6.62     | 34             | 27               | 27               | 12   | d(Ir)+ $\pi(dox)$   |
| H-8        | -6.96     | 7              | 32               | 32               | 29   | $\pi(dox + acac)$   |
| H-9        | -7.14     | 3              | 37               | 37               | 22   | $\pi(dox + acac)$   |
| H-10       | -7.17     | 1              | 49               | 49               | 0    | $\pi(dox)$          |

**Table S4.** Frontier molecular orbital energies (eV) and compositions (%) of different fragments in the ground state for complex **1b**

| MO         | Energy/eV | Composition(%) |                         |                         |             | Assign                   |
|------------|-----------|----------------|-------------------------|-------------------------|-------------|--------------------------|
|            |           | Ir             | <i>fox</i> <sub>A</sub> | <i>fox</i> <sub>B</sub> | <i>acac</i> |                          |
| L+10       | 1.18      | 83             | 7                       | 7                       | 3           | d(Ir)                    |
| L+9        | 1.08      | 52             | 23                      | 23                      | 3           | d(Ir)+ $\pi^*(fox)$      |
| L+8        | 0.25      | 8              | 45                      | 45                      | 1           | $\pi^*(fox)$             |
| L+7        | 0.09      | 4              | 48                      | 48                      | 1           | $\pi^*(fox)$             |
| L+6        | -0.52     | 2              | 1                       | 1                       | 96          | $\pi^*(acac)$            |
| L+5        | -0.68     | 1              | 49                      | 50                      | 1           | $\pi^*(fox)$             |
| L+4        | -0.69     | 0              | 50                      | 50                      | 0           | $\pi^*(fox)$             |
| L+3        | -0.92     | 3              | 47                      | 48                      | 2           | $\pi^*(fox)$             |
| L+2        | -0.96     | 4              | 48                      | 48                      | 1           | $\pi^*(fox)$             |
| L+1        | -1.70     | 1              | 49                      | 49                      | 0           | $\pi^*(fox)$             |
| LUMO       | -1.75     | 1              | 50                      | 50                      | 0           | $\pi^*(fox)$             |
| <b>Gap</b> |           |                | <b>3.53</b>             |                         |             |                          |
| HOMO       | -5.28     | 45             | 25                      | 25                      | 5           | d(Ir)+ $\pi(fox)$        |
| H-1        | -5.35     | 26             | 6                       | 6                       | 62          | d(Ir)+ $\pi(acac)$       |
| H-2        | -5.88     | 5              | 36                      | 36                      | 23          | $\pi(fox + acac)$        |
| H-3        | -5.92     | 38             | 28                      | 28                      | 7           | d(Ir)+ $\pi(fox)$        |
| H-4        | -6.47     | 4              | 21                      | 21                      | 53          | $\pi(fox + acac)$        |
| H-5        | -6.53     | 42             | 26                      | 26                      | 5           | d(Ir)+ $\pi(fox)$        |
| H-6        | -6.68     | 20             | 22                      | 22                      | 36          | d(Ir)+ $\pi(fox + acac)$ |
| H-7        | -6.81     | 23             | 34                      | 34                      | 8           | d(Ir)+ $\pi(fox)$        |
| H-8        | -7.07     | 2              | 48                      | 48                      | 2           | $\pi(fox)$               |
| H-9        | -7.14     | 2              | 49                      | 49                      | 1           | $\pi(fox)$               |
| H-10       | -7.30     | 6              | 22                      | 22                      | 51          | $\pi(fox+ acac)$         |

**Table S5.** Frontier molecular orbital energies (eV) and compositions (%) of different fragments in the ground state for complex **2**

| MO         | Energy/eV | Composition(%) |                         |                         |                          | Assign                        |
|------------|-----------|----------------|-------------------------|-------------------------|--------------------------|-------------------------------|
|            |           | Ir             | <i>fox</i> <sub>A</sub> | <i>fox</i> <sub>B</sub> | <i>Et<sub>2</sub>dtc</i> |                               |
| L+10       | 1.00      | 37             | 24                      | 24                      | 16                       | d(Ir)+ $\pi^*(fox + Et_2dtc)$ |
| L+9        | 0.85      | 39             | 21                      | 21                      | 19                       | d(Ir)+ $\pi^*(fox + Et_2dtc)$ |
| L+8        | 0.26      | 9              | 43                      | 43                      | 5                        | $\pi^*(fox)$                  |
| L+7        | 0.07      | 7              | 44                      | 44                      | 5                        | $\pi^*(fox)$                  |
| L+6        | -0.27     | 5              | 0                       | 0                       | 94                       | $\pi^*(Et_2dtc)$              |
| L+5        | -0.62     | 1              | 49                      | 50                      | 0                        | $\pi^*(fox)$                  |
| L+4        | -0.63     | 0              | 50                      | 49                      | 0                        | $\pi^*(fox)$                  |
| L+3        | -0.83     | 3              | 48                      | 48                      | 1                        | $\pi^*(fox)$                  |
| L+2        | -0.89     | 4              | 47                      | 47                      | 2                        | $\pi^*(fox)$                  |
| L+1        | -1.62     | 1              | 49                      | 50                      | 0                        | $\pi^*(fox)$                  |
| LUMO       | -1.69     | 1              | 50                      | 49                      | 0                        | $\pi^*(fox)$                  |
| <b>Gap</b> |           | <b>3.53</b>    |                         |                         |                          |                               |
| HOMO       | -5.22     | 33             | 11                      | 11                      | 45                       | d(Ir)+ $\pi(Et_2dtc)$         |
| H-1        | -5.42     | 30             | 21                      | 21                      | 28                       | d(Ir)+ $\pi(fox + Et_2dtc)$   |
| H-2        | -5.43     | 37             | 15                      | 15                      | 32                       | d(Ir)+ $\pi(fox + Et_2dtc)$   |
| H-3        | -5.87     | 2              | 15                      | 15                      | 69                       | $\pi(fox + Et_2dtc)$          |
| H-4        | -5.97     | 10             | 35                      | 35                      | 21                       | $\pi(fox + Et_2dtc)$          |
| H-5        | -6.01     | 2              | 35                      | 35                      | 29                       | $\pi(fox + Et_2dtc)$          |
| H-6        | -6.74     | 2              | 45                      | 46                      | 7                        | $\pi(fox)$                    |
| H-7        | -6.76     | 33             | 25                      | 25                      | 18                       | d(Ir)+ $\pi(fox + Et_2dtc)$   |
| H-8        | -7.01     | 24             | 26                      | 26                      | 24                       | d(Ir)+ $\pi(fox + Et_2dtc)$   |
| H-9        | -7.02     | 9              | 36                      | 36                      | 19                       | $\pi(fox + Et_2dtc)$          |
| H-10       | -7.07     | 23             | 28                      | 28                      | 22                       | d(Ir)+ $\pi(fox + Et_2dtc)$   |

**Table S6.** Frontier molecular orbital energies (eV) and compositions (%) of different fragments in the ground state for complex **3**

| MO         | Energy/eV | Composition(%) |         |         |           | Assign                        |
|------------|-----------|----------------|---------|---------|-----------|-------------------------------|
|            |           | Ir             | $fox_A$ | $fox_B$ | $Et_2dtp$ |                               |
| L+10       | 0.93      | 16             | 23      | 31      | 30        | d(Ir)+ $\pi^*(fox + Et_2dtp)$ |
| L+9        | 0.74      | 51             | 8       | 8       | 32        | d(Ir)+ $\pi^*(Et_2dtp)$       |
| L+8        | 0.40      | 35             | 25      | 25      | 15        | d(Ir)+ $\pi^*(fox + Et_2dtp)$ |
| L+7        | 0.04      | 22             | 20      | 19      | 39        | d(Ir)+ $\pi^*(fox + Et_2dtp)$ |
| L+6        | -0.13     | 12             | 39      | 38      | 11        | $\pi^*(fox)$                  |
| L+5        | -0.79     | 7              | 43      | 44      | 6         | $\pi^*(fox)$                  |
| L+4        | -0.81     | 1              | 91      | 8       | 0         | $\pi^*(fox_A)$                |
| L+3        | -1.06     | 0              | 8       | 91      | 0         | $\pi^*(fox_B)$                |
| L+2        | -1.11     | 4              | 57      | 37      | 2         | $\pi^*(fox)$                  |
| L+1        | -1.82     | 4              | 37      | 57      | 2         | $\pi^*(fox)$                  |
| LUMO       | -1.89     | 1              | 57      | 42      | 0         | $\pi^*(fox)$                  |
| <b>Gap</b> |           | <b>3.60</b>    |         |         |           |                               |
| HOMO       | -5.49     | 38             | 18      | 18      | 27        | d(Ir)+ $\pi(fox + Et_2dtp)$   |
| H-1        | -5.67     | 40             | 21      | 16      | 23        | d(Ir)+ $\pi(fox + Et_2dtp)$   |
| H-2        | -5.72     | 29             | 14      | 18      | 40        | d(Ir)+ $\pi(fox + Et_2dtp)$   |
| H-3        | -6.23     | 9              | 34      | 39      | 19        | $\pi(fox + Et_2dtp)$          |
| H-4        | -6.27     | 5              | 36      | 31      | 29        | $\pi(fox + Et_2dtp)$          |
| H-5        | -6.34     | 4              | 19      | 18      | 59        | $\pi(fox + Et_2dtp)$          |
| H-6        | -6.94     | 1              | 42      | 43      | 14        | $\pi(fox)$                    |
| H-7        | -7.00     | 31             | 25      | 24      | 20        | d(Ir)+ $\pi(oxd + Et_2dtp)$   |
| H-8        | -7.21     | 8              | 45      | 28      | 19        | $\pi(fox + Et_2dtp)$          |
| H-9        | -7.25     | 1              | 41      | 56      | 2         | $\pi(fox)$                    |
| H-10       | -7.27     | 25             | 20      | 24      | 31        | d(Ir)+ $\pi(fox + Et_2dtp)$   |

**Table S7.** Frontier molecular orbital energies (eV) and compositions (%) of different fragments in the ground state for complex **4a**

| MO         | Energy/eV | Composition(%) |                          |                          |             | Assign                    |
|------------|-----------|----------------|--------------------------|--------------------------|-------------|---------------------------|
|            |           | Ir             | <i>pypz</i> <sub>1</sub> | <i>pypz</i> <sub>2</sub> | <i>acac</i> |                           |
| L+10       | 0.82      | 57             | 23                       | 12                       | 8           | d(Ir)+ $\pi^*(pypz_1)$    |
| L+9        | 0.51      | 58             | 6                        | 21                       | 15          | d(Ir)+ $\pi^*(pypz_2)$    |
| L+8        | 0.22      | 0              | 0                        | 100                      | 0           | $\pi^*(pypz_2)$           |
| L+7        | 0.13      | 0              | 100                      | 0                        | 0           | $\pi^*(pypz_1)$           |
| L+6        | -0.14     | 1              | 0                        | 99                       | 0           | $\pi^*(pypz)$             |
| L+5        | -0.22     | 1              | 99                       | 0                        | 0           | $\pi^*(pypz_1)$           |
| L+4        | -0.78     | 1              | 7                        | 86                       | 6           | $\pi^*(pypz_2)$           |
| L+3        | -0.91     | 3              | 3                        | 5                        | 89          | $\pi^*(acac)$             |
| L+2        | -1.01     | 1              | 90                       | 9                        | 1           | $\pi^*(pypz_1)$           |
| L+1        | -1.35     | 4              | 1                        | 94                       | 1           | $\pi^*(pypz_2)$           |
| LUMO       | -1.52     | 3              | 94                       | 1                        | 1           | $\pi^*(pypz_1)$           |
| <b>Gap</b> |           | <b>3.54</b>    |                          |                          |             |                           |
| HOMO       | -5.06     | 16             | 11                       | 72                       | 1           | d(Ir)+ $\pi(pypz_2)$      |
| H-1        | -5.19     | 18             | 63                       | 15                       | 4           | d(Ir)+ $\pi(pypz)$        |
| H-2        | -5.61     | 15             | 9                        | 42                       | 35          | d(Ir)+ $\pi(pypz_2+acac)$ |
| H-3        | -5.87     | 16             | 58                       | 12                       | 15          | d(Ir)+ $\pi(pypz_1+acac)$ |
| H-4        | -5.96     | 8              | 24                       | 45                       | 23          | $\pi(pypz+acac)$          |
| H-5        | -6.10     | 1              | 3                        | 96                       | 0           | $\pi(pypz_2)$             |
| H-6        | -6.16     | 0              | 96                       | 3                        | 1           | $\pi(pypz_1)$             |
| H-7        | -6.41     | 36             | 38                       | 17                       | 10          | d(Ir)+ $\pi(pypz)$        |
| H-8        | -6.59     | 34             | 25                       | 35                       | 7           | d(Ir)+ $\pi pypz$         |
| H-9        | -6.73     | 17             | 5                        | 67                       | 10          | d(Ir)+ $\pi(pypz_2)$      |
| H-10       | -6.81     | 6              | 82                       | 3                        | 9           | $\pi(pypz_1)$             |



**Table S8.** Frontier molecular orbital energies (eV) and compositions (%) of different fragments in the ground state for complex **4b**

| MO         | Energy/eV | Composition(%) |                           |                           |             | Assign                       |
|------------|-----------|----------------|---------------------------|---------------------------|-------------|------------------------------|
|            |           | Ir             | <i>Opyrz</i> <sub>1</sub> | <i>Opyrz</i> <sub>2</sub> | <i>acac</i> |                              |
| L+10       | 0.54      | 57             | 23                        | 13                        | 7           | d(Ir)+ $\pi^*(Opyrz_1)$      |
| L+9        | 0.38      | 1              | 0                         | 99                        | 0           | $\pi^*(Opyrz_2)$             |
| L+8        | 0.28      | 50             | 21                        | 17                        | 12          | d(Ir)+ $\pi^*(Opyrz)$        |
| L+7        | 0.25      | 9              | 85                        | 3                         | 2           | $\pi^*(Opyrz_1)$             |
| L+6        | -0.45     | 1              | 0                         | 99                        | 0           | $\pi^*(Opyrz_2)$             |
| L+5        | -0.56     | 1              | 98                        | 1                         | 0           | $\pi^*(Opyrz_1)$             |
| L+4        | -0.90     | 1              | 9                         | 88                        | 2           | $\pi^*(Opyrz_2)$             |
| L+3        | -1.10     | 2              | 53                        | 1                         | 44          | $\pi^*(Opyrz_1 + acac)$      |
| L+2        | -1.12     | 1              | 40                        | 10                        | 50          | $\pi^*(Opyrz_1 + acac)$      |
| L+1        | -1.50     | 4              | 2                         | 93                        | 0           | $\pi^*(Opyrz_2)$             |
| LUMO       | -1.66     | 3              | 94                        | 2                         | 1           | $\pi^*(Opyrz_1)$             |
| <b>Gap</b> |           | <b>3.63</b>    |                           |                           |             |                              |
| HOMO       | -5.29     | 15             | 12                        | 72                        | 1           | d(Ir)+ $\pi(Opyrz_2)$        |
| H-1        | -5.39     | 18             | 57                        | 20                        | 5           | d(Ir)+ $\pi(Opyrz)$          |
| H-2        | -5.62     | 7              | 13                        | 72                        | 8           | $\pi(Opyrz_2)$               |
| H-3        | -5.80     | 9              | 85                        | 4                         | 3           | $\pi(Opyrz_1)$               |
| H-4        | -6.05     | 15             | 4                         | 20                        | 61          | d(Ir)+ $\pi(Opyrz_2 + acac)$ |
| H-5        | -6.51     | 0              | 0                         | 99                        | 1           | $\pi(Opyrz_2)$               |
| H-6        | -6.60     | 12             | 71                        | 15                        | 3           | $\pi(Opyrz)$                 |
| H-7        | -6.61     | 17             | 59                        | 18                        | 6           | d(Ir)+ $\pi(Opyrz)$          |
| H-8        | -6.78     | 8              | 23                        | 64                        | 5           | $\pi(Opyrz)$                 |
| H-9        | -6.87     | 39             | 16                        | 34                        | 10          | d(Ir)+ $\pi(Opyrz)$          |
| H-10       | -7.01     | 10             | 77                        | 8                         | 5           | $\pi(Opyrz_1)$               |

**Table S9.** Frontier molecular orbital energies (eV) and compositions (%) of different fragments in the ground state for complex **4c**

| MO         | Energy/eV | Composition(%) |                           |                           |             | Assign                  |
|------------|-----------|----------------|---------------------------|---------------------------|-------------|-------------------------|
|            |           | Ir             | <i>Spypz</i> <sub>1</sub> | <i>Spypz</i> <sub>2</sub> | <i>acac</i> |                         |
| L+10       | 0.51      | 32             | 48                        | 16                        | 4           | d(Ir)+ $\pi^*(Spypz)$   |
| L+9        | 0.28      | 56             | 11                        | 19                        | 14          | d(Ir)+ $\pi^*(Spypz_2)$ |
| L+8        | 0.08      | 1              | 0                         | 99                        | 0           | $\pi^*(Spypz_2)$        |
| L+7        | -0.03     | 0              | 99                        | 0                         | 0           | $\pi^*(Spypz_1)$        |
| L+6        | -0.44     | 1              | 0                         | 99                        | 0           | $\pi^*(Spypz_2)$        |
| L+5        | -0.54     | 1              | 99                        | 1                         | 0           | $\pi^*(Spypz_1)$        |
| L+4        | -0.90     | 1              | 9                         | 88                        | 3           | $\pi^*(Spypz_2)$        |
| L+3        | -1.09     | 3              | 14                        | 1                         | 82          | $\pi^*(acac)$           |
| L+2        | -1.12     | 0              | 78                        | 11                        | 10          | $\pi^*(Spypz_1)$        |
| L+1        | -1.51     | 4              | 2                         | 94                        | 0           | $\pi^*(Spypz_2)$        |
| LUMO       | -1.67     | 3              | 94                        | 2                         | 1           | $\pi^*(Spypz_1)$        |
| <b>Gap</b> |           | <b>3.63</b>    |                           |                           |             |                         |
| HOMO       | -5.30     | 11             | 14                        | 73                        | 1           | $\pi(Spypz_2)$          |
| H-1        | -5.39     | 17             | 6                         | 70                        | 6           | d(Ir)+ $\pi(Spypz_2)$   |
| H-2        | -5.46     | 8              | 64                        | 27                        | 1           | $\pi(Spypz)$            |
| H-3        | -5.55     | 7              | 85                        | 6                         | 1           | $\pi(Spypz_1)$          |
| H-4        | -5.99     | 17             | 5                         | 11                        | 67          | d(Ir)+ $\pi(acac)$      |
| H-5        | -6.47     | 0              | 0                         | 99                        | 0           | $\pi(Spypz_2)$          |
| H-6        | -6.54     | 0              | 99                        | 0                         | 0           | $\pi(Spypz_1)$          |
| H-7        | -6.59     | 17             | 16                        | 61                        | 6           | d(Ir)+ $\pi(Spypz)$     |
| H-8        | -6.71     | 20             | 40                        | 35                        | 6           | d(Ir)+ $\pi(Spypz)$     |
| H-9        | -6.79     | 24             | 49                        | 20                        | 7           | d(Ir)+ $\pi(Spypz)$     |
| H-10       | -6.87     | 34             | 40                        | 19                        | 7           | d(Ir)+ $\pi(Spypz)$     |

**Table S10.** Frontier molecular orbital energies (eV) and compositions (%) of different fragments in the ground state for complex **5**

| MO         | Energy/eV | Composition(%) |                          |                          |             | Assign                      |
|------------|-----------|----------------|--------------------------|--------------------------|-------------|-----------------------------|
|            |           | Ir             | <i>bptz</i> <sub>1</sub> | <i>bptz</i> <sub>2</sub> | <i>acac</i> |                             |
| L+10       | 1.62      | 14             | 81                       | 2                        | 2           | $\pi^*(bptz_1)$             |
| L+9        | 1.43      | 74             | 17                       | 2                        | 7           | d(Ir)+ $\pi^*(bptz_1)$      |
| L+8        | 1.41      | 79             | 2                        | 13                       | 6           | d(Ir)                       |
| L+7        | 1.33      | 73             | 12                       | 1                        | 13          | d(Ir)                       |
| L+6        | 0.50      | 58             | 23                       | 12                       | 8           | d(Ir)+ $\pi^*(bptz_1)$      |
| L+5        | 0.18      | 59             | 6                        | 20                       | 15          | d(Ir)+ $\pi^*(bptz_2)$      |
| L+4        | -0.96     | 1              | 13                       | 85                       | 2           | $\pi^*(bptz_2)$             |
| L+3        | -1.15     | 1              | 85                       | 10                       | 3           | $\pi^*(bptz_1)$             |
| L+2        | -1.21     | 3              | 3                        | 4                        | 90          | $\pi^*(acac)$               |
| L+1        | -1.59     | 4              | 2                        | 93                       | 0           | $\pi^*(bptz_2)$             |
| LUMO       | -1.72     | 3              | 93                       | 2                        | 1           | $\pi^*(bptz_1)$             |
| <b>Gap</b> |           |                |                          | <b>3.80</b>              |             |                             |
| HOMO       | -5.52     | 22             | 26                       | 50                       | 2           | d(Ir)+ $\pi(bptz)$          |
| H-1        | -5.61     | 19             | 45                       | 29                       | 6           | d(Ir)+ $\pi(bptz)$          |
| H-2        | -6.02     | 17             | 10                       | 16                       | 56          | d(Ir)+ $\pi(acac)$          |
| H-3        | -6.41     | 35             | 48                       | 8                        | 10          | d(Ir)+ $\pi(bptz_1)$        |
| H-4        | -6.57     | 30             | 7                        | 54                       | 8           | d(Ir)+ $\pi(bptz_2)$        |
| H-5        | -6.74     | 1              | 1                        | 95                       | 2           | $\pi(bptz_2)$               |
| H-6        | -6.81     | 1              | 95                       | 4                        | 0           | $\pi(bptz_1)$               |
| H-7        | -6.94     | 40             | 11                       | 22                       | 27          | d(Ir)+ $\pi(bptz_2 + acac)$ |
| H-8        | -7.49     | 8              | 56                       | 5                        | 31          | $\pi(bptz_1 + acac)$        |
| H-9        | -7.53     | 11             | 63                       | 12                       | 14          | $\pi(bptz_1)$               |
| H-10       | -7.66     | 22             | 7                        | 52                       | 20          | d(Ir)+ $\pi(bptz_2 + acac)$ |

**Table S11.** Selected calculated wavelength (nm)/energies (eV), oscillator strength ( $f$ ), major contribution, transition characters, and the experimental wavelength (nm) for **1a**, **1b**, **2** and **3** in CH<sub>2</sub>Cl<sub>2</sub> media

|                 | state           | $\lambda$ /E | Oscillator    | Configuration                              | Assignment                                         | Nature        | Exptl. <sup>a</sup> |
|-----------------|-----------------|--------------|---------------|--------------------------------------------|----------------------------------------------------|---------------|---------------------|
| <b>1a</b>       | S <sub>1</sub>  | 429/2.89     | 0.1753        | HOMO→LUMO(95%)                             | d(Ir)+ $\pi(dox) \rightarrow \pi^*(dox)$           | MLCT/ LLCT/IL | 424                 |
|                 | S <sub>11</sub> | 325/3.82     | 0.3387        | H-3→L+1 (76%),                             | $\pi(dox+acac) \rightarrow \pi^*(dox)$             | LLCT/IL       | 355                 |
|                 | S <sub>12</sub> | 322/3.86     | 0.2954        | H-1→L+3 (75%)                              | d(Ir)+ $\pi(acac) \rightarrow \pi^*(dox)$          | MLCT/ LLCT    |                     |
|                 | S <sub>17</sub> | 290/4.28     | 0.4636        | H-2→L+2 (53%)                              | d(Ir)+ $\pi(dox) \rightarrow \pi^*(dox)$           | MLCT/ LLCT/IL | 298                 |
|                 | S <sub>19</sub> | 284/4.37     | 0.117         | H-5→LUMO (61%)                             | $\pi(dox+acac) \rightarrow \pi^*(dox)$             | LLCT/IL       |                     |
|                 | S <sub>31</sub> | 263/4.71     | 0.1792        | HOMO→L+7(63%)                              | d(Ir)+ $\pi(dox) \rightarrow \pi^*(dox)$           | MLCT/ LLCT/IL | 246                 |
| <b>1b</b>       | S <sub>1</sub>  | 408/3.04     | 0.2087        | HOMO→LUMO(94%)                             | d(Ir)+ $\pi(fox) \rightarrow \pi^*(fox)$           | MLCT/ LLCT/IL | 369                 |
|                 | S <sub>10</sub> | 323/3.83     | 0.6028        | H-2→L+1 (88%)                              | $\pi(fox+acac) \rightarrow \pi^*(fox)$             | LLCT/IL       | 312                 |
|                 | S <sub>12</sub> | 317/3.91     | 0.1139        | H-1→L+3 (90%)                              | d(Ir)+ $\pi(acac) \rightarrow \pi^*(fox)$          | MLCT/ LLCT    |                     |
|                 | S <sub>15</sub> | 288/4.31     | 0.4419        | H-4→LUMO (68%),                            | $\pi(fox+acac) \rightarrow \pi^*(fox)$             | LLCT/IL       |                     |
|                 | S <sub>33</sub> | 263/4.71     | 0.1562        | H-7→L+1 (57%),                             | d(Ir)+ $\pi(fox) \rightarrow \pi^*(fox)$           | MLCT/ LLCT/IL |                     |
|                 | S <sub>40</sub> | 252/ 4.91    | 0.1512        | H-8→LUMO (64%),                            | $\pi(fox) \rightarrow \pi^*(fox)$                  | LLCT/IL       | 230                 |
| <b>2</b>        | S <sub>1</sub>  | 401/3.10     | 0.1698        | HOMO→LUMO (95%)                            | d(Ir)+ $\pi(C) \rightarrow \pi^*(fox)$             | MLCT/ LLCT    | 402                 |
|                 | S <sub>4</sub>  | 373/3.33     | 0.1058        | H-2→LUMO (82%)                             | d(Ir)+ $\pi(fox+C) \rightarrow \pi^*(fox)$         | MLCT/ LLCT/IL |                     |
|                 | S <sub>10</sub> | 317/3.91     | 0.3174        | H-4→LUMO (47%)                             | $\pi(fox+C) \rightarrow \pi^*(fox)$                | LLCT/IL       | 323                 |
|                 | S <sub>11</sub> | 316/3.93     | 0.293         | H-4→LUMO (41%)                             | $\pi(fox+C) \rightarrow \pi^*(fox)$                | LLCT/IL       |                     |
|                 |                 |              |               | H-3→L+1 (37%)                              | $\pi(fox+C) \rightarrow \pi^*(fox)$                | LLCT/IL       |                     |
|                 | S <sub>14</sub> | 309/4.01     | 0.3051        | H-5→L+1 (47%)                              | $\pi(fox+C) \rightarrow \pi^*(fox)$                | LLCT/IL       |                     |
|                 |                 |              |               | H-3→L+1 (31%)                              | $\pi(fox+C) \rightarrow \pi^*(fox)$                | LLCT/IL       |                     |
|                 | S <sub>29</sub> | 268/4.63     | 0.1537        | H-4→L+2 (51%)                              | $\pi(fox+C) \rightarrow \pi^*(fox)$                | LLCT/IL       |                     |
|                 | S <sub>47</sub> | 251/4.93     | 0.1557        | H-8→LUMO (44%)                             | d(Ir)+ $\pi(fox+C) \rightarrow \pi^*(fox)$         | MLCT/ LLCT/IL | 238                 |
| S <sub>55</sub> | 245/5.06        | 0.098        | H-8→L+1 (20%) | d(Ir)+ $\pi(fox+C) \rightarrow \pi^*(fox)$ | MLCT/ LLCT/IL                                      |               |                     |
| <b>3</b>        | S <sub>1</sub>  | 392/3.16     | 0.2184        | HOMO→LUMO (94%)                            | d(Ir)+ $\pi(fox+C) \rightarrow \pi^*(fox)$         | MLCT/ LLCT/IL | 397                 |
|                 | S <sub>4</sub>  | 359/3.45     | 0.1607        | H-1→L+1 (72%)                              | d(Ir)+ $\pi(fox+C) \rightarrow \pi^*(fox)$         | MLCT/ LLCT/IL |                     |
|                 | S <sub>9</sub>  | 310/4.00     | 0.6498        | H-3→LUMO (65%)                             | $\pi(fox+C) \rightarrow \pi^*(fox)$                | LLCT/IL       | 313                 |
|                 | S <sub>10</sub> | 309/4.02     | 0.1095        | H-4→LUMO (64%)                             | $\pi(fox+C) \rightarrow \pi^*(fox)$                | LLCT/IL       |                     |
|                 | S <sub>14</sub> | 300/4.13     | 0.1803        | H-4→L+1 (84%)                              | $\pi(fox+C) \rightarrow \pi^*(fox)$                | LLCT/IL       |                     |
|                 | S <sub>49</sub> | 243/5.10     | 0.127         | H-1→L+8 (26%)                              | d(Ir)+ $\pi(fox+C) \rightarrow d(Ir)+\pi^*(fox+C)$ | MLCT/ LLCT/IL | 241                 |

<sup>a</sup> C= Et<sub>2</sub>dtp(2); Et<sub>2</sub>dtp(3)

**Table S12.** Selected calculated wavelength (nm)/energies (eV), oscillator strength (*f*), major contribution and transition characters for **4a-4c** and **5** in CH<sub>2</sub>Cl<sub>2</sub> media

|                 | state           | $\lambda/E$ | Oscillator     | Configuration                                              | Assignment                                                            | Nature                                                            |               |
|-----------------|-----------------|-------------|----------------|------------------------------------------------------------|-----------------------------------------------------------------------|-------------------------------------------------------------------|---------------|
| <b>4a</b>       | S <sub>1</sub>  | 385/3.22    | 0.0616         | HOMO→LUMO(72%)                                             | d(Ir)+ $\pi$ (pypz <sub>2</sub> )→ $\pi^*$ (pypz <sub>1</sub> )       | MLCT/ LLCT                                                        |               |
|                 | S <sub>9</sub>  | 322/3.86    | 0.1474         | HOMO→L+3 (73%)                                             | d(Ir)+ $\pi$ (pypz <sub>2</sub> )→ $\pi^*$ (acac)                     | MLCT/ LLCT                                                        |               |
|                 | S <sub>12</sub> | 310/4.00    | 0.1378         | H-3→LUMO(57%)                                              | d(Ir)+ $\pi$ (pypz <sub>1</sub> +acac)→ $\pi^*$ (pypz <sub>1</sub> )  | MLCT/ LLCT/IL                                                     |               |
|                 | S <sub>13</sub> | 305/4.07    | 0.1537         | H-3→L+1 (54%)                                              | d(Ir)+ $\pi$ (pypz <sub>1</sub> +acac)→ $\pi^*$ (pypz <sub>2</sub> )  | MLCT/ LLCT                                                        |               |
|                 | S <sub>16</sub> | 298/4.17    | 0.1343         | H-4→LUMO (83%)                                             | $\pi$ (pypz +acac)→ $\pi^*$ (pypz <sub>1</sub> )                      | LLCT/IL                                                           |               |
|                 | S <sub>17</sub> | 295/4.20    | 0.2323         | H-4→L+1 (66%)                                              | $\pi$ (pypz +acac)→ $\pi^*$ (pypz <sub>2</sub> )                      | LLCT/IL                                                           |               |
|                 | S <sub>19</sub> |             | 288/4.30       | 0.1808                                                     | HOMO→L+5 (26%)                                                        | d(Ir)+ $\pi$ (pypz <sub>2</sub> )→ $\pi^*$ (pypz <sub>1</sub> )   | MLCT/ LLCT    |
|                 |                 |             |                |                                                            | HOMO→L+6 (26%)                                                        | d(Ir)+ $\pi$ (pypz <sub>2</sub> )→ $\pi^*$ (pypz <sub>2</sub> )   | MLCT/IL       |
|                 | S <sub>22</sub> | 284/4.37    | 0.2045         | HOMO→L+6(33%)                                              | d(Ir)+ $\pi$ (pypz <sub>2</sub> )→ $\pi^*$ (pypz <sub>2</sub> )       | MLCT/IL                                                           |               |
|                 | S <sub>37</sub> |             | 264/4.70       | 0.1558                                                     | H-1→L+9(16%)                                                          | d(Ir)+ $\pi$ (pypz)→d(Ir)+ $\pi^*$ (pypz <sub>2</sub> )           | MLCT/ LLCT/IL |
| HOMO→L+9 (14%)  |                 |             |                |                                                            | d(Ir)+ $\pi$ (pypz <sub>2</sub> )→d(Ir)+ $\pi^*$ (pypz <sub>2</sub> ) | MLCT/ LLCT/IL                                                     |               |
| <b>4b</b>       | S <sub>1</sub>  | 378/3.28    | 0.0432         | HOMO→LUMO(82%)                                             | d(Ir)+ $\pi$ (Opypz <sub>2</sub> )→ $\pi^*$ (Opypz <sub>1</sub> )     | MLCT/ LLCT                                                        |               |
|                 | S <sub>8</sub>  | 329/3.77    | 0.1512         | H-2→L+1 (79%)                                              | $\pi$ (Opypz <sub>2</sub> )→ $\pi^*$ (Opypz <sub>2</sub> )            | IL                                                                |               |
|                 | S <sub>10</sub> | 320/3.87    | 0.1405         | H-3→L+1 (58%)                                              | $\pi$ (Opypz <sub>1</sub> )→ $\pi^*$ (Opypz <sub>2</sub> )            | LLCT                                                              |               |
|                 | S <sub>16</sub> | 300/4.13    | 0.1325         | HOMO→L+4 (57%)                                             | d(Ir)+ $\pi$ (Opypz <sub>2</sub> )→ $\pi^*$ (Opypz <sub>2</sub> )     | MLCT/ IL                                                          |               |
|                 | S <sub>19</sub> | 294/4.22    | 0.4826         | HOMO→L+5 (50%)                                             | d(Ir)+ $\pi$ (Opypz <sub>2</sub> )→ $\pi^*$ (Opypz <sub>1</sub> )     | MLCT/ LLCT                                                        |               |
|                 | S <sub>20</sub> | 290/4.28    | 0.1463         | HOMO→L+6 (31%)                                             | d(Ir)+ $\pi$ (Opypz <sub>2</sub> )→ $\pi^*$ (Opypz <sub>2</sub> )     | MLCT/ IL                                                          |               |
|                 | S <sub>26</sub> | 281/4.41    | 0.1057         | H-3→L+3 (78%)                                              | $\pi$ (Opypz <sub>1</sub> )→ $\pi^*$ (Opypz <sub>1</sub> +acac)       | LLCT/IL                                                           |               |
|                 | S <sub>57</sub> | 278/4.45    | 0.1338         | H-2→L+4 (69%)                                              | $\pi$ (Opypz <sub>2</sub> )→ $\pi^*$ (Opypz <sub>2</sub> )            | IL                                                                |               |
|                 | S <sub>44</sub> | 253/4.90    | 0.1089         | H-6→L+1 (30%)                                              | $\pi$ (Opypz)→ $\pi^*$ (Opypz <sub>2</sub> )                          | LLCT/IL                                                           |               |
|                 | S <sub>53</sub> | 247/5.02    | 0.1793         | HOMO→L+7 (48%)                                             | d(Ir)+ $\pi$ (Opypz <sub>2</sub> )→ $\pi^*$ (Opypz <sub>1</sub> )     | MLCT/ LLCT                                                        |               |
|                 | S <sub>54</sub> |             | 246/5.05       | 0.1458                                                     | H-1→L+8(25%)                                                          | d(Ir)+ $\pi$ (Opypz)→d(Ir)+ $\pi^*$ (Opypz)                       | MLCT/ LLCT/IL |
| HOMO→L+8 (22%)  |                 |             |                |                                                            | d(Ir)+ $\pi$ (Opypz <sub>2</sub> )→d(Ir)+ $\pi^*$ (Opypz)             | MLCT/ LLCT/IL                                                     |               |
| <b>4c</b>       | S <sub>1</sub>  | 378/3.28    | 0.0581         | HOMO→LUMO(78%)                                             | $\pi$ (Spypz <sub>2</sub> )→ $\pi^*$ (Spypz <sub>1</sub> )            | LLCT                                                              |               |
|                 | S <sub>7</sub>  | 342/3.62    | 0.1751         | H-3→LUMO (62%)                                             | $\pi$ (Spypz <sub>1</sub> )→ $\pi^*$ (Spypz <sub>1</sub> )            | IL                                                                |               |
|                 | S <sub>14</sub> | 312/3.97    | 0.1238         | HOMO→L+3 (65%)                                             | $\pi$ (Spypz <sub>2</sub> )→ $\pi^*$ (acac)                           | LLCT                                                              |               |
|                 | S <sub>21</sub> | 293/4.23    | 0.2631         | HOMO→L+5 (45%)                                             | $\pi$ (Spypz <sub>2</sub> )→ $\pi^*$ (Spypz <sub>1</sub> )            | LLCT                                                              |               |
|                 | S <sub>26</sub> |             | 287/4.32       | 0.3384                                                     | H-2→L+6 (23%)                                                         | $\pi$ (Spypz)→ $\pi^*$ (Spypz <sub>2</sub> )                      | LLCT/IL       |
|                 |                 |             |                |                                                            | H-1→L+6 (22%)                                                         | d(Ir)+ $\pi$ (Spypz <sub>2</sub> )→ $\pi^*$ (Spypz <sub>2</sub> ) | MLCT/IL       |
|                 | S <sub>41</sub> | 260/4.76    | 0.2737         | HOMO→L+7 (57%)                                             | $\pi$ (Spypz <sub>2</sub> )→ $\pi^*$ (Spypz <sub>1</sub> )            | LLCT                                                              |               |
|                 | S <sub>43</sub> |             | 258/4.81       | 0.2368                                                     | H-1→L+8(22%)                                                          | d(Ir)+ $\pi$ (Spypz <sub>2</sub> )→ $\pi^*$ (Spypz <sub>2</sub> ) | MLCT/IL       |
|                 |                 |             |                |                                                            | HOMO→L+8 (26%)                                                        | $\pi$ (Spypz <sub>2</sub> )→ $\pi^*$ (Spypz <sub>2</sub> )        | IL            |
|                 | S <sub>45</sub> | 257/4.83    | 0.1333         | H-10→LUMO (30%),                                           | d(Ir)+ $\pi$ (Spypz)→ $\pi^*$ (Spypz <sub>1</sub> )                   | MLCT/ LLCT/IL                                                     |               |
| S <sub>47</sub> | 255/4.87        | 0.191       | HOMO→L+8 (20%) | $\pi$ (Spypz <sub>2</sub> )→ $\pi^*$ (Spypz <sub>2</sub> ) | IL                                                                    |                                                                   |               |
| <b>5</b>        | S <sub>1</sub>  | 370/3.35    | 0.0659         | HOMO→LUMO(82%)                                             | d(Ir)+ $\pi$ (bptz)→ $\pi^*$ (bptz <sub>1</sub> )                     | MLCT/ LLCT/IL                                                     |               |
|                 | S <sub>16</sub> | 286/4.34    | 0.1084         | H-3→L+1 (52%)                                              | d(Ir)+ $\pi$ (bptz <sub>1</sub> )→ $\pi^*$ (bptz <sub>2</sub> )       | MLCT/ LLCT                                                        |               |
|                 | S <sub>18</sub> | 279/4.45    | 0.1505         | H-4→LUMO (40%)                                             | d(Ir)+ $\pi$ (bptz <sub>2</sub> )→ $\pi^*$ (bptz <sub>1</sub> )       | MLCT/ LLCT                                                        |               |
|                 | S <sub>33</sub> | 246/5.04    | 0.1708         | H-3→L+4 (62%)                                              | d(Ir)+ $\pi$ (bptz <sub>1</sub> )→ $\pi^*$ (bptz <sub>2</sub> )       | MLCT/ LLCT                                                        |               |
|                 | S <sub>27</sub> | 261/4.75    | 0.0912         | H-5→LUMO (40%)                                             | d(Ir)+ $\pi$ (bptz <sub>1</sub> )→ $\pi^*$ (bptz <sub>1</sub> )       | MLCT/ IL                                                          |               |

**Table S13.** Single-electron transitions according to TDDFT calculations for the absorption of the complexes in CH<sub>2</sub>Cl<sub>2</sub> Media

| state          | λ/E            | Oscillator | Configuration  | Assignment                                                     | Nature                                                                                            | Exptl. <sup>a</sup> |     |
|----------------|----------------|------------|----------------|----------------------------------------------------------------|---------------------------------------------------------------------------------------------------|---------------------|-----|
| <b>1a</b>      | T <sub>1</sub> | 481/2.58   | 0              | HOMO→LUMO (60%)                                                | d(Ir)+ π( <i>dox</i> )→π*( <i>dox</i> )                                                           | MLCT/ LLCT/IL       | 465 |
|                | T <sub>2</sub> | 476/2.61   | 0              | HOMO→L+1 (47%)                                                 | d(Ir)+ π( <i>dox</i> )→π*( <i>dox</i> )                                                           | MLCT/ LLCT/IL       |     |
|                | T <sub>3</sub> | 427/2.90   | 0              | H-2→LUMO(20%)                                                  | d(Ir)+ π( <i>dox</i> )→π*( <i>dox</i> )                                                           | MLCT/ LLCT/IL       |     |
|                |                |            |                | H-1→L+1(27%)                                                   | d(Ir)+ π( <i>acac</i> )→π*( <i>dox</i> )                                                          | MLCT/ LLCT          |     |
|                |                |            |                | HOMO→LUMO (24%)                                                | d(Ir)+ π( <i>dox</i> )→π*( <i>dox</i> )                                                           | MLCT/ LLCT/IL       |     |
| T <sub>4</sub> | 426/2.91       | 0          | H-1→LUMO(31%)  | d(Ir)+ π( <i>acac</i> )→π*( <i>dox</i> )                       | MLCT/ LLCT                                                                                        |                     |     |
|                |                |            | HOMO→L+1 (33%) | d(Ir)+ π( <i>dox</i> )→π*( <i>dox</i> )                        | MLCT/ LLCT/IL                                                                                     |                     |     |
| T <sub>5</sub> | 407/3.04       | 0          | H-1→L+4 (74%)  | d(Ir)+ π( <i>acac</i> )→π*( <i>dox+acac</i> )                  | MLCT/ LLCT/IL                                                                                     |                     |     |
| <b>1b</b>      | T <sub>1</sub> | 469/2.64   | 0              | HOMO→LUMO (47%)                                                | d(Ir)+ π( <i>fox</i> )→π*( <i>fox</i> )                                                           | MLCT/ LLCT/IL       | 468 |
|                | T <sub>2</sub> | 466/2.66   | 0              | HOMO→L+1 (37%)                                                 | d(Ir)+ π( <i>fox</i> )→π*( <i>fox</i> )                                                           | MLCT/ LLCT/IL       |     |
|                | T <sub>3</sub> | 410/3.03   | 0              | HOMO→LUMO (31%)                                                | d(Ir)+ π( <i>fox</i> )→π*( <i>fox</i> )                                                           | MLCT/ LLCT/IL       | 432 |
|                | T <sub>4</sub> | 407/3.05   | 0              | HOMO→L+1 (42%)                                                 | d(Ir)+ π( <i>fox</i> )→π*( <i>fox</i> )                                                           | MLCT/ LLCT/IL       |     |
|                | T <sub>5</sub> | 406/3.05   | 0              | H-1→L+4 (64%)                                                  | d(Ir)+ π( <i>acac</i> )→π*( <i>fox</i> )                                                          | MLCT/ LLCT          |     |
| <b>2</b>       | T <sub>1</sub> | 467/2.66   | 0              | HOMO→LUMO (43%)                                                | d(Ir)+ π(C)→π*( <i>fox</i> )                                                                      | MLCT/ LLCT          | 472 |
|                | T <sub>2</sub> | 464/2.67   | 0              | H-1→LUMO (35%)                                                 | d(Ir)+ π( <i>fox</i> +C)→π*( <i>fox</i> )                                                         | MLCT/ LLCT/IL       |     |
|                |                |            |                | HOMO→L+1 (31%)                                                 | d(Ir)+ π(C)→π*( <i>fox</i> )                                                                      | MLCT/ LLCT          |     |
|                | T <sub>3</sub> | 402/3.09   | 0              | HOMO→LUMO (23%)                                                | d(Ir)+ π(C)→π*( <i>fox</i> )                                                                      | MLCT/ LLCT          | 436 |
|                | T <sub>4</sub> | 394/3.14   | 0              | HOMO→L+1 (37%)                                                 | d(Ir)+ π(C)→π*( <i>fox</i> )                                                                      | MLCT/ LLCT          |     |
| T <sub>5</sub> | 389/3.19       | 0          | H-1→L+2 (25%)  | d(Ir)+ π( <i>fox</i> +C)→π*( <i>fox</i> )                      | MLCT/ LLCT/IL                                                                                     |                     |     |
| <b>3</b>       | T <sub>1</sub> | 463/2.68   | 0              | HOMO→LUMO (44%)                                                | d(Ir)+ π( <i>fox</i> +C)→π*( <i>fox</i> )                                                         | MLCT/ LLCT/IL       | 469 |
|                |                |            |                | H-1→L+1 (29%)                                                  | d(Ir)+ π( <i>fox</i> +C)→π*( <i>fox</i> )                                                         | MLCT/ LLCT/IL       |     |
|                | T <sub>2</sub> | 462/2.69   | 0              | H-1→LUMO (40%)                                                 | d(Ir)+ π( <i>fox</i> +C)→π*( <i>fox</i> )                                                         | MLCT/ LLCT/IL       |     |
|                |                |            |                | HOMO→L+1 (32%)                                                 | d(Ir)+ π( <i>fox</i> +C)→π*( <i>fox</i> )                                                         | MLCT/ LLCT/IL       |     |
|                | T <sub>3</sub> | 396/3.13   | 0              | HOMO→L+2 (25%)                                                 | d(Ir)+ π( <i>fox</i> +C)→π*( <i>fox</i> )                                                         | MLCT/ LLCT/IL       | 434 |
| T <sub>4</sub> | 391/3.17       | 0          | HOMO→L+3 (29%) | d(Ir)+ π( <i>fox</i> +C)→π*( <i>fox<sub>B</sub></i> )          | MLCT/ LLCT/IL                                                                                     |                     |     |
| T <sub>5</sub> | 385/3.22       | 0          | HOMO→L+1 (35%) | d(Ir)+ π( <i>fox</i> +C)→π*( <i>fox</i> )                      | MLCT/ LLCT/IL                                                                                     |                     |     |
| <b>4a</b>      | T <sub>1</sub> | 440/2.82   | 0              | HOMO→L+1 (44%)                                                 | d(Ir)+ π( <i>pypz</i> <sub>2</sub> )→π*( <i>pypz</i> <sub>2</sub> )                               | MLCT/ IL            |     |
|                | T <sub>2</sub> | 439/2.82   | 0              | H-1→LUMO (32%)                                                 | d(Ir)+ π( <i>pypz</i> )→π*( <i>pypz</i> <sub>1</sub> )                                            | MLCT/ LLCT/IL       |     |
|                | T <sub>3</sub> | 415/2.99   | 0              | H-2→L+2 (56%)                                                  | d(Ir)+ π( <i>pypz</i> <sub>2</sub> + <i>acac</i> )→π*( <i>pypz</i> <sub>1</sub> )                 | MLCT/ LLCT          |     |
|                | T <sub>4</sub> | 399/3.11   | 0              | H-1→L+1 (56%)                                                  | d(Ir)+ π( <i>pypz</i> )→π*( <i>pypz</i> <sub>2</sub> )                                            | MLCT/ LLCT/IL       |     |
|                | T <sub>5</sub> | 391/3.17   | 0              | H-3→LUMO(44%)                                                  | d(Ir)+ π( <i>pypz</i> <sub>1</sub> + <i>acac</i> )→π*( <i>pypz</i> <sub>1</sub> )                 | MLCT/ LLCT/IL       |     |
| <b>4b</b>      | T <sub>1</sub> | 445/2.79   | 0              | HOMO→L+1 (40%)                                                 | d(Ir)+ π( <i>Oppyz</i> <sub>2</sub> )→π*( <i>Oppyz</i> <sub>2</sub> )                             | MLCT/ IL            |     |
|                | T <sub>2</sub> | 443/2.80   | 0              | H-1→LUMO(23%)                                                  | d(Ir)+π( <i>Oppyz</i> )→π*( <i>Oppyz</i> <sub>1</sub> )                                           | MLCT/ LLCT/IL       |     |
|                |                |            |                | HOMO→LUMO (27%)                                                | d(Ir)+ π( <i>Oppyz</i> <sub>2</sub> )→π*( <i>Oppyz</i> <sub>1</sub> )                             | MLCT/ LLCT          |     |
|                | T <sub>3</sub> | 413/3.00   | 0              | H-4→L+2 (45%)                                                  | d(Ir)+ π( <i>Oppyz</i> <sub>2</sub> + <i>acac</i> )→π*( <i>Oppyz</i> <sub>1</sub> + <i>acac</i> ) | MLCT/ LLCT/IL       |     |
| T <sub>4</sub> | 400/3.10       | 0          | H-3→LUMO(46%)  | π( <i>Oppyz</i> <sub>1</sub> )→π*( <i>Oppyz</i> <sub>1</sub> ) | IL                                                                                                |                     |     |

|           |                |          |   |                                  |                                                                                                                                  |                    |
|-----------|----------------|----------|---|----------------------------------|----------------------------------------------------------------------------------------------------------------------------------|--------------------|
| <b>4c</b> | T <sub>5</sub> | 398/3.11 | 0 | H-1→L+1 (44%)                    | d(Ir)+ π( <i>Opyyz</i> )→π*( <i>Opyyz</i> <sub>2</sub> )                                                                         | MLCT/ LLCT/IL      |
|           | T <sub>1</sub> | 451/2.75 | 0 | HOMO→L+1 (58%)                   | π( <i>Spyyz</i> <sub>2</sub> )→π*( <i>Spyyz</i> <sub>2</sub> )                                                                   | IL                 |
|           | T <sub>2</sub> | 448/2.77 | 0 | H-1→LUMO (32%)                   | d(Ir)+ π( <i>Spyyz</i> <sub>2</sub> )→π*( <i>Spyyz</i> <sub>1</sub> )                                                            | MLCT/ LLCT         |
|           | T <sub>3</sub> | 413/3.01 | 0 | H-4→L+2 (61%)                    | d(Ir)+ π( <i>acac</i> )→π*( <i>Spyyz</i> <sub>1</sub> )                                                                          | MLCT/ LLCT         |
|           | T <sub>4</sub> | 405/3.06 | 0 | H-3→LUMO(49%)<br>HOMO→LUMO (33%) | π( <i>Spyyz</i> <sub>1</sub> )→π*( <i>Spyyz</i> <sub>1</sub> )<br>π( <i>Spyyz</i> <sub>2</sub> )→π*( <i>Spyyz</i> <sub>1</sub> ) | IL<br>LLCT         |
| <b>5</b>  | T <sub>5</sub> | 399/3.11 | 0 | H-2→L+1 (44%)<br>H-1→L+1 (38%)   | π( <i>Spyyz</i> )→π*( <i>Spyyz</i> <sub>2</sub> )<br>d(Ir)+ π( <i>Spyyz</i> <sub>2</sub> )→π*( <i>Spyyz</i> <sub>2</sub> )       | LLCT/IL<br>MLCT/IL |
|           | T <sub>1</sub> | 444/2.80 | 0 | HOMO→LUMO (58%)                  | d(Ir)+ π( <i>bptz</i> )→π*( <i>bptz</i> <sub>1</sub> )                                                                           | MLCT/ LLCT/IL      |
|           | T <sub>2</sub> | 437/2.84 | 0 | HOMO→L+1 (39%)                   | d(Ir)+ π( <i>bptz</i> )→π*( <i>bptz</i> <sub>2</sub> )                                                                           | MLCT/ LLCT/IL      |
|           | T <sub>3</sub> | 411/3.02 | 0 | H-2→L+2 (62%)                    | d(Ir)+ π( <i>acac</i> )→π*( <i>acac</i> )                                                                                        | MLCT/ IL           |
|           | T <sub>4</sub> | 382/3.24 | 0 | H-1→L+1 (48%)                    | d(Ir)+ π( <i>bptz</i> )→π*( <i>bptz</i> <sub>2</sub> )                                                                           | MLCT/ LLCT/IL      |
|           | T <sub>5</sub> | 364/3.40 | 0 | H-1→LUMO (37%)                   | d(Ir)+ π( <i>bptz</i> )→π*( <i>bptz</i> <sub>1</sub> )                                                                           | MLCT/ LLCT/IL      |

C= *Et*<sub>2</sub>*dte*(**2**); *Et*<sub>2</sub>*dtp*(**3**)

**Table S14.** The coordinates of optimized geometries at ground states and lowest triplet states of the studied complexes

| <b>1a</b><br>S0 |   |           |           | <b>1a</b><br>T1 |    |   |           |           |           |
|-----------------|---|-----------|-----------|-----------------|----|---|-----------|-----------|-----------|
| 1               | C | -1.513933 | -1.656215 | -1.831866       | 1  | C | 1.409243  | -1.478359 | 1.933256  |
| 2               | C | -0.181112 | -1.354024 | -1.434362       | 2  | C | 0.103949  | -1.101885 | 1.503675  |
| 3               | C | 0.823250  | -2.043333 | -2.126188       | 3  | C | -0.973069 | -1.634759 | 2.219646  |
| 4               | H | 1.866653  | -1.853355 | -1.888851       | 4  | H | -1.988014 | -1.362604 | 1.947216  |
| 5               | C | 0.516621  | -2.959122 | -3.129332       | 5  | C | -0.758286 | -2.517019 | 3.275301  |
| 6               | C | -0.807509 | -3.231216 | -3.490701       | 6  | C | 0.536658  | -2.882644 | 3.663832  |
| 7               | H | -1.026010 | -3.948831 | -4.276081       | 7  | H | 0.682231  | -3.571004 | 4.491331  |
| 8               | C | -1.836372 | -2.572174 | -2.838316       | 8  | C | 1.632598  | -2.358743 | 2.997523  |
| 9               | H | -2.875038 | -2.757924 | -3.100623       | 9  | H | 2.645229  | -2.618629 | 3.293514  |
| 10              | C | -2.449687 | -0.893738 | -1.068863       | 10 | C | 2.406578  | -0.802374 | 1.176575  |
| 11              | C | -4.126269 | 0.039609  | -0.143261       | 11 | C | 4.154663  | 0.005570  | 0.261081  |
| 12              | C | -5.526408 | 0.332530  | 0.097826        | 12 | C | 5.570331  | 0.201647  | 0.033863  |
| 13              | C | -5.869156 | 1.266217  | 1.084628        | 13 | C | 5.986031  | 1.083080  | -0.974628 |
| 14              | H | -5.080078 | 1.752942  | 1.649404        | 14 | H | 5.238203  | 1.600323  | -1.567661 |
| 15              | C | -7.204923 | 1.555195  | 1.325344        | 15 | C | 7.340088  | 1.280751  | -1.201067 |
| 16              | H | -7.468053 | 2.279617  | 2.090799        | 16 | H | 7.659403  | 1.963549  | -1.983169 |
| 17              | C | -8.205468 | 0.920379  | 0.589507        | 17 | C | 8.288429  | 0.606802  | -0.430677 |
| 18              | C | -7.864750 | -0.007736 | -0.391570       | 18 | C | 7.875741  | -0.269360 | 0.570880  |
| 19              | H | -8.641493 | -0.503710 | -0.966602       | 19 | H | 8.611552  | -0.795858 | 1.171938  |
| 20              | C | -6.530019 | -0.304469 | -0.640729       | 20 | C | 6.522235  | -0.475266 | 0.807049  |
| 21              | H | -6.261652 | -1.027118 | -1.405017       | 21 | H | 6.198764  | -1.157349 | 1.587064  |
| 22              | C | 1.514141  | -1.654895 | 1.832804        | 22 | C | -1.265856 | -1.693570 | -1.851952 |
| 23              | C | 0.181336  | -1.353101 | 1.434973        | 23 | C | 0.044603  | -1.275486 | -1.437699 |
| 24              | C | -0.823041 | -2.041942 | 2.127235        | 24 | C | 1.135012  | -1.859282 | -2.051324 |
| 25              | H | -1.866436 | -1.852224 | 1.889662        | 25 | H | 2.142043  | -1.547740 | -1.787382 |
| 26              | C | -0.516429 | -2.956942 | 3.131104        | 26 | C | 0.972915  | -2.849335 | -3.048877 |
| 27              | C | 0.807691  | -3.228672 | 3.492783        | 27 | C | -0.302074 | -3.261245 | -3.420498 |
| 28              | H | 1.026176  | -3.945673 | 4.278727        | 28 | H | -0.425567 | -4.032356 | -4.176775 |
| 29              | C | 1.836564  | -2.570060 | 2.839979        | 29 | C | -1.429612 | -2.694719 | -2.830265 |
| 30              | H | 2.875221  | -2.755531 | 3.102520        | 30 | H | -2.427034 | -3.017228 | -3.115876 |
| 31              | C | 2.449866  | -0.89288  | 1.069308        | 31 | C | -2.272727 | -0.976164 | -1.194828 |
| 32              | C | 4.126415  | 0.039895  | 0.143073        | 32 | C | -4.038113 | -0.158430 | -0.258867 |
| 33              | C | 5.526547  | 0.332684  | -0.098218       | 33 | C | -5.438624 | 0.009417  | -0.003099 |
| 34              | C | 5.869267  | 1.265787  | -1.085582       | 34 | C | -5.875370 | 0.957886  | 0.942691  |
| 35              | H | 5.080172  | 1.752176  | -1.650625       | 35 | H | -5.137035 | 1.556684  | 1.467149  |
| 36              | C | 7.205027  | 1.554621  | -1.326509       | 36 | C | -7.227752 | 1.118074  | 1.192503  |
| 37              | H | 7.468136  | 2.278590  | -2.092400       | 37 | H | -7.553386 | 1.853076  | 1.923985  |
| 38              | C | 8.205593  | 0.920240  | -0.590325       | 38 | C | -8.172822 | 0.344202  | 0.512343  |



|    |    |           |           |           |    |    |           |           |           |
|----|----|-----------|-----------|-----------|----|----|-----------|-----------|-----------|
| 39 | C  | 7.864903  | -0.007294 | 0.391311  | 39 | C  | -7.745311 | -0.595377 | -0.424642 |
| 40 | H  | 8.641663  | -0.502928 | 0.966613  | 40 | H  | -8.473362 | -1.200841 | -0.958149 |
| 41 | C  | 6.530179  | -0.303879 | 0.640686  | 41 | C  | -6.392537 | -0.767351 | -0.685701 |
| 42 | H  | 6.261834  | -1.026076 | 1.405407  | 42 | H  | -6.061753 | -1.499349 | -1.415526 |
| 43 | Ir | 0.000069  | 0.042201  | -0.000138 | 43 | Ir | 0.027728  | 0.180592  | -0.028298 |
| 44 | N  | -2.017948 | -0.066045 | -0.144561 | 44 | N  | 2.045844  | 0.049582  | 0.239108  |
| 45 | N  | -3.082625 | 0.534212  | 0.450906  | 45 | N  | 3.150663  | 0.564869  | -0.350718 |
| 46 | N  | 2.018087  | -0.065821 | 0.144452  | 46 | N  | -1.934476 | 0.000447  | -0.310960 |
| 47 | N  | 3.082754  | 0.534070  | -0.451417 | 47 | N  | -3.029058 | 0.480564  | 0.281270  |
| 48 | O  | -3.787869 | -0.868161 | -1.111827 | 48 | O  | 3.742957  | -0.867742 | 1.238285  |
| 49 | O  | 3.788045  | -0.867225 | 1.112255  | 49 | O  | -3.624923 | -1.093460 | -1.206956 |
| 50 | C  | 0.032439  | 2.817088  | 1.255760  | 50 | C  | -0.206379 | 2.903692  | -1.350731 |
| 51 | C  | -0.033352 | 2.816842  | -1.256537 | 51 | C  | -0.539639 | 2.951414  | 1.122982  |
| 52 | C  | -0.000490 | 3.442712  | -0.000446 | 52 | C  | -0.622779 | 3.516530  | -0.163576 |
| 53 | H  | -0.000605 | 4.526889  | -0.000553 | 53 | H  | -0.939292 | 4.551045  | -0.227863 |
| 54 | C  | -0.043415 | 3.684655  | -2.492490 | 54 | C  | -0.903870 | 3.792742  | 2.317669  |
| 55 | H  | -0.911867 | 3.429241  | -3.109090 | 55 | H  | -0.075571 | 3.787504  | 3.033621  |
| 56 | H  | -0.066910 | 4.752170  | -2.260697 | 56 | H  | -1.148146 | 4.823434  | 2.050778  |
| 57 | H  | 0.848761  | 3.466665  | -3.090024 | 57 | H  | -1.766056 | 3.337502  | 2.817704  |
| 58 | C  | 0.042348  | 3.685137  | 2.491551  | 58 | C  | -0.181136 | 3.700326  | -2.627694 |
| 59 | H  | 0.065008  | 4.752619  | 2.259530  | 59 | H  | -0.563688 | 4.714970  | -2.496122 |
| 60 | H  | -0.849373 | 3.466607  | 3.089550  | 60 | H  | 0.847521  | 3.747514  | -3.001521 |
| 61 | H  | 0.911296  | 3.430496  | 3.107792  | 61 | H  | -0.775845 | 3.183400  | -3.388116 |
| 62 | O  | 0.055282  | 1.572475  | 1.495910  | 62 | O  | 0.208270  | 1.705405  | -1.469670 |
| 63 | O  | -0.055963 | 1.572187  | -1.496464 | 63 | O  | -0.152316 | 1.776747  | 1.395868  |
| 64 | H  | -9.249938 | 1.149822  | 0.781327  | 64 | H  | 9.347817  | 0.764730  | -0.612028 |
| 65 | H  | 1.324044  | -3.473269 | -3.646342 | 65 | H  | -1.611134 | -2.930401 | 3.807659  |
| 66 | H  | 9.250058  | 1.149567  | -0.782313 | 66 | H  | -9.232547 | 0.474618  | 0.712544  |
| 67 | H  | -1.323857 | -3.470750 | 3.648443  | 67 | H  | 1.849219  | -3.290971 | -3.514927 |

| <b>1b</b><br>S0 |   |           |           | <b>1b</b><br>T1 |    |   |           |           |           |
|-----------------|---|-----------|-----------|-----------------|----|---|-----------|-----------|-----------|
| 1               | C | 1.434742  | -1.558382 | 1.889990        | 1  | C | 1.335847  | -1.455856 | 1.941895  |
| 2               | C | 0.117074  | -1.251718 | 1.439570        | 2  | C | 0.031676  | -1.159758 | 1.453244  |
| 3               | C | -0.921229 | -1.931098 | 2.082724        | 3  | C | -1.029926 | -1.787944 | 2.105933  |
| 4               | H | -1.961066 | -1.755587 | 1.825632        | 4  | H | -2.061510 | -1.614740 | 1.817284  |
| 5               | C | -0.636543 | -2.840513 | 3.090756        | 5  | C | -0.777768 | -2.648635 | 3.165334  |
| 6               | C | 0.656455  | -3.134398 | 3.521786        | 6  | C | 0.502326  | -2.936529 | 3.635097  |
| 7               | H | 0.808469  | -3.856891 | 4.315952        | 7  | H | 0.629261  | -3.619157 | 4.467943  |
| 8               | C | 1.708394  | -2.476447 | 2.908317        | 8  | C | 1.575432  | -2.325331 | 3.009906  |
| 9               | H | 2.732493  | -2.670582 | 3.216056        | 9  | H | 2.590503  | -2.517938 | 3.346492  |
| 10              | C | 2.401758  | -0.797543 | 1.168365        | 10 | C | 2.332464  | -0.741811 | 1.210896  |
| 11              | C | 4.117215  | 0.135003  | 0.315591        | 11 | C | 4.085690  | 0.140416  | 0.382107  |
| 12              | C | 5.525274  | 0.425197  | 0.133497        | 12 | C | 5.501933  | 0.409367  | 0.236318  |
| 13              | C | 5.911446  | 1.357348  | -0.839782       | 13 | C | 5.930556  | 1.291341  | -0.765567 |
| 14              | H | 5.149072  | 1.844598  | -1.439292       | 14 | H | 5.194640  | 1.756217  | -1.413879 |
| 15              | C | 7.252198  | 1.650790  | -1.031699       | 15 | C | 7.279946  | 1.563667  | -0.924136 |
| 16              | H | 7.575098  | 2.368121  | -1.778746       | 16 | H | 7.635957  | 2.241787  | -1.692414 |
| 17              | C | 8.199433  | 1.006411  | -0.244669       | 17 | C | 8.192732  | 0.948528  | -0.075231 |
| 18              | C | 7.843681  | 0.079664  | 0.725389        | 18 | C | 7.794390  | 0.071475  | 0.924231  |
| 19              | H | 8.615945  | -0.399952 | 1.317315        | 19 | H | 8.540944  | -0.386515 | 1.564242  |
| 20              | C | 6.499098  | -0.210245 | 0.912985        | 20 | C | 6.441390  | -0.197491 | 1.078308  |
| 21              | H | 6.202613  | -0.932170 | 1.667094        | 21 | H | 6.111927  | -0.880605 | 1.854553  |
| 22              | C | -1.434941 | -1.558705 | -1.889747       | 22 | C | -1.467313 | -1.722577 | -1.798522 |
| 23              | C | -0.117244 | -1.251985 | -1.439446       | 23 | C | -0.110875 | -1.342111 | -1.403519 |
| 24              | C | 0.921012  | -1.931522 | -2.082506       | 24 | C | 0.934595  | -2.019958 | -2.003699 |
| 25              | H | 1.960865  | -1.755982 | -1.825496       | 25 | H | 1.969871  | -1.782021 | -1.779677 |
| 26              | C | 0.636257  | -2.841145 | -3.090334       | 26 | C | 0.672646  | -3.027748 | -2.935027 |
| 27              | C | -0.656767 | -3.135088 | -3.521242       | 27 | C | -0.624790 | -3.408453 | -3.307546 |
| 28              | H | -0.808838 | -3.857744 | -4.315249       | 28 | H | -0.751721 | -4.204090 | -4.034778 |
| 29              | C | -1.708662 | -2.476977 | -2.907867       | 29 | C | -1.701850 | -2.762739 | -2.745981 |
| 30              | H | -2.732779 | -2.671148 | -3.215524       | 30 | H | -2.717354 | -3.031123 | -3.019506 |
| 31              | C | -2.401907 | -0.797686 | -1.168241       | 31 | C | -2.412192 | -0.954091 | -1.163485 |
| 32              | C | -4.117296 | 0.135087  | -0.315581       | 32 | C | -4.103226 | 0.100108  | -0.340826 |
| 33              | C | -5.525337 | 0.425361  | -0.133483       | 33 | C | -5.460325 | 0.443506  | -0.113853 |
| 34              | C | -5.911438 | 1.357671  | 0.839673        | 34 | C | -5.787417 | 1.488814  | 0.781523  |
| 35              | H | -5.149025 | 1.844976  | 1.439086        | 35 | H | -4.987356 | 2.019757  | 1.286998  |
| 36              | C | -7.252173 | 1.651196  | 1.031589        | 36 | C | -7.107267 | 1.826392  | 1.007865  |
| 37              | H | -7.575020 | 2.368650  | 1.778542        | 37 | H | -7.379342 | 2.624388  | 1.690891  |
| 38              | C | -8.199459 | 1.006739  | 0.244686        | 38 | C | -8.110380 | 1.123328  | 0.342039  |
| 39              | C | -7.843778 | 0.079834  | -0.725247       | 39 | C | -7.822417 | 0.091129  | -0.544186 |
| 40              | H | -8.616081 | -0.399837 | -1.317076       | 40 | H | -8.635602 | -0.428593 | -1.040200 |
| 41              | C | -6.499212 | -0.210157 | -0.912845       | 41 | C | -6.500122 | -0.249539 | -0.772977 |

|    |    |           |           |           |    |    |           |           |           |
|----|----|-----------|-----------|-----------|----|----|-----------|-----------|-----------|
| 42 | H  | -6.202780 | -0.932205 | -1.666857 | 42 | H  | -6.255178 | -1.051673 | -1.460946 |
| 43 | F  | -1.655338 | -3.473565 | 3.688409  | 43 | F  | -1.816014 | -3.235600 | 3.772292  |
| 44 | F  | 9.492311  | 1.288318  | -0.427743 | 44 | F  | 9.493383  | 1.209874  | -0.226177 |
| 45 | F  | 1.655010  | -3.474351 | -3.687896 | 45 | F  | 1.706028  | -3.668729 | -3.501229 |
| 46 | F  | -9.492320 | 1.288726  | 0.427761  | 46 | F  | -9.387525 | 1.453096  | 0.563316  |
| 47 | Ir | -0.000039 | 0.143601  | -0.000072 | 47 | Ir | -0.041435 | 0.152387  | -0.074449 |
| 48 | N  | 2.010676  | 0.033696  | 0.229390  | 48 | N  | 1.983412  | 0.051861  | 0.226367  |
| 49 | N  | 3.100735  | 0.633482  | -0.320148 | 49 | N  | 3.096307  | 0.621303  | -0.308043 |
| 50 | N  | -2.010756 | 0.033737  | -0.229459 | 50 | N  | -1.992430 | 0.041812  | -0.284983 |
| 51 | N  | -3.100771 | 0.633662  | 0.320011  | 51 | N  | -3.022451 | 0.669232  | 0.205870  |
| 52 | O  | 3.737372  | -0.774905 | 1.267519  | 52 | O  | 3.663207  | -0.727064 | 1.355938  |
| 53 | O  | -3.737525 | -0.775045 | -1.267327 | 53 | O  | -3.780608 | -0.926377 | -1.213114 |
| 54 | C  | 0.023662  | 2.912860  | -1.256428 | 54 | C  | 0.222446  | 2.797403  | -1.537270 |
| 55 | C  | -0.022833 | 2.913050  | 1.255904  | 55 | C  | 0.023030  | 3.015684  | 0.958597  |
| 56 | C  | 0.000640  | 3.538487  | -0.000307 | 56 | C  | 0.196259  | 3.524753  | -0.339313 |
| 57 | H  | 0.000938  | 4.622577  | -0.000387 | 57 | H  | 0.294541  | 4.600744  | -0.426423 |
| 58 | C  | -0.064583 | 3.779539  | 2.491438  | 58 | C  | -0.045177 | 3.987128  | 2.111197  |
| 59 | H  | 0.780655  | 3.527537  | 3.140859  | 59 | H  | 0.700338  | 3.711466  | 2.864507  |
| 60 | H  | -0.036373 | 4.847144  | 2.261097  | 60 | H  | 0.117475  | 5.022389  | 1.802727  |
| 61 | H  | -0.977940 | 3.557495  | 3.054393  | 61 | H  | -1.028066 | 3.905755  | 2.588553  |
| 62 | C  | 0.065727  | 3.779148  | -2.492090 | 62 | C  | 0.398819  | 3.545536  | -2.834931 |
| 63 | H  | 0.037964  | 4.846797  | -2.261884 | 63 | H  | 0.485048  | 4.625274  | -2.693035 |
| 64 | H  | 0.978973  | 3.556640  | -3.055039 | 64 | H  | 1.296151  | 3.174692  | -3.342187 |
| 65 | H  | -0.779655 | 3.527438  | -3.141442 | 65 | H  | -0.450946 | 3.334577  | -3.493043 |
| 66 | O  | 0.013446  | 1.667367  | -1.496404 | 66 | O  | 0.104982  | 1.539311  | -1.679393 |
| 67 | O  | -0.013373 | 1.667585  | 1.496052  | 67 | O  | -0.096659 | 1.799179  | 1.294778  |

| <b>2</b> |   |           |           | <b>2</b>  |    |   |           |           |           |
|----------|---|-----------|-----------|-----------|----|---|-----------|-----------|-----------|
| S0       |   |           |           | T1        |    |   |           |           |           |
| 1        | C | 1.377476  | -1.891201 | 1.916836  | 1  | C | 1.414815  | -1.945972 | 1.904858  |
| 2        | C | 0.070013  | -1.546843 | 1.465766  | 2  | C | 0.073540  | -1.563928 | 1.480926  |
| 3        | C | -0.989412 | -2.196976 | 2.105719  | 3  | C | -0.987196 | -2.184770 | 2.112326  |
| 4        | H | -2.023361 | -1.990827 | 1.846716  | 4  | H | -2.017526 | -1.944482 | 1.867673  |
| 5        | C | -0.732925 | -3.116801 | 3.111503  | 5  | C | -0.749338 | -3.137318 | 3.109548  |
| 6        | C | 0.550811  | -3.448728 | 3.543431  | 6  | C | 0.535404  | -3.514970 | 3.517602  |
| 7        | H | 0.680765  | -4.177361 | 4.335953  | 7  | H | 0.644699  | -4.262395 | 4.296775  |
| 8        | C | 1.622253  | -2.819552 | 2.933879  | 8  | C | 1.626398  | -2.923392 | 2.920543  |
| 9        | H | 2.639830  | -3.044139 | 3.242733  | 9  | H | 2.636133  | -3.189073 | 3.217701  |
| 10       | C | 2.366838  | -1.151180 | 1.205327  | 10 | C | 2.379957  | -1.245939 | 1.221280  |
| 11       | C | 4.112320  | -0.254541 | 0.378829  | 11 | C | 4.103627  | -0.260716 | 0.380953  |
| 12       | C | 5.528617  | 0.000643  | 0.207514  | 12 | C | 5.465722  | 0.052499  | 0.165059  |
| 13       | C | 5.944126  | 0.923893  | -0.762157 | 13 | C | 5.825451  | 1.045208  | -0.779274 |
| 14       | H | 5.197448  | 1.429094  | -1.366654 | 14 | H | 5.042346  | 1.556768  | -1.329427 |
| 15       | C | 7.292966  | 1.184863  | -0.944517 | 15 | C | 7.153470  | 1.353974  | -0.995352 |
| 16       | H | 7.638445  | 1.894185  | -1.689147 | 16 | H | 7.449757  | 2.110199  | -1.714945 |
| 17       | C | 8.218815  | 0.517195  | -0.151563 | 17 | C | 8.134439  | 0.676393  | -0.271495 |
| 18       | C | 7.833904  | -0.401406 | 0.815013  | 18 | C | 7.815237  | -0.303356 | 0.663019  |
| 19       | H | 8.590142  | -0.900118 | 1.411860  | 19 | H | 8.611811  | -0.804722 | 1.203042  |
| 20       | C | 6.481308  | -0.658868 | 0.992914  | 20 | C | 6.485129  | -0.616339 | 0.882401  |
| 21       | H | 6.161974  | -1.373909 | 1.744271  | 21 | H | 6.216411  | -1.377352 | 1.607209  |
| 22       | C | -1.377387 | -1.891832 | -1.916377 | 22 | C | -1.329763 | -1.942369 | -1.857852 |
| 23       | C | -0.069956 | -1.547255 | -1.465375 | 23 | C | -0.025704 | -1.588381 | -1.412777 |
| 24       | C | 0.989518  | -2.197551 | -2.105085 | 24 | C | 1.039154  | -2.255250 | -2.021593 |
| 25       | H | 2.023453  | -1.991243 | -1.846150 | 25 | H | 2.070990  | -2.043904 | -1.759521 |
| 26       | C | 0.733108  | -3.117738 | -3.110556 | 26 | C | 0.788610  | -3.206410 | -3.000373 |
| 27       | C | -0.550598 | -3.449887 | -3.542405 | 27 | C | -0.492543 | -3.550044 | -3.429461 |
| 28       | H | -0.680494 | -4.178804 | -4.334674 | 28 | H | -0.618172 | -4.302921 | -4.199655 |
| 29       | C | -1.622087 | -2.820553 | -2.933101 | 29 | C | -1.567623 | -2.902288 | -2.846734 |
| 30       | H | -2.639644 | -3.045299 | -3.241907 | 30 | H | -2.583288 | -3.136434 | -3.154113 |
| 31       | C | -2.366806 | -1.151628 | -1.205143 | 31 | C | -2.326063 | -1.179510 | -1.180331 |
| 32       | C | -4.112357 | -0.254710 | -0.379086 | 32 | C | -4.082022 | -0.246504 | -0.419612 |
| 33       | C | -5.528666 | 0.000543  | -0.207977 | 33 | C | -5.499915 | 0.018610  | -0.281511 |
| 34       | C | -5.944249 | 0.924075  | 0.761394  | 34 | C | -5.928241 | 0.972293  | 0.652493  |
| 35       | H | -5.197617 | 1.429440  | 1.365811  | 35 | H | -5.190548 | 1.492604  | 1.255162  |
| 36       | C | -7.293102 | 1.185115  | 0.943562  | 36 | C | -7.278872 | 1.243280  | 0.803196  |
| 37       | H | -7.638638 | 1.894655  | 1.687958  | 37 | H | -7.634655 | 1.975651  | 1.520100  |
| 38       | C | -8.218891 | 0.517230  | 0.150719  | 38 | C | -8.193341 | 0.554727  | 0.014749  |
| 39       | C | -7.833906 | -0.401652 | -0.815562 | 39 | C | -7.795413 | -0.394394 | -0.916619 |
| 40       | H | -8.590097 | -0.900526 | -1.412332 | 40 | H | -8.543196 | -0.908730 | -1.510791 |
| 41       | C | -6.481297 | -0.659181 | -0.993271 | 41 | C | -6.441090 | -0.661710 | -1.063043 |

|    |    |           |           |           |    |    |           |           |           |
|----|----|-----------|-----------|-----------|----|----|-----------|-----------|-----------|
| 42 | H  | -6.161906 | -1.374441 | -1.744396 | 42 | H  | -6.111838 | -1.400815 | -1.786294 |
| 43 | C  | -0.075913 | 4.890267  | 1.241148  | 43 | C  | -0.209363 | 4.862249  | 1.306586  |
| 44 | H  | 0.499727  | 5.810895  | 1.090782  | 44 | H  | 0.340911  | 5.801642  | 1.180605  |
| 45 | H  | 0.425278  | 4.317467  | 2.026812  | 45 | H  | 0.289361  | 4.297355  | 2.099349  |
| 46 | C  | -1.509545 | 5.206656  | 1.644187  | 46 | C  | -1.662435 | 5.129369  | 1.673438  |
| 47 | H  | -2.024635 | 5.784000  | 0.868242  | 47 | H  | -2.174962 | 5.696270  | 0.888255  |
| 48 | H  | -1.521149 | 5.794699  | 2.568324  | 48 | H  | -1.716137 | 5.709663  | 2.600828  |
| 49 | H  | -2.066128 | 4.280688  | 1.816324  | 49 | H  | -2.194311 | 4.185396  | 1.824850  |
| 50 | C  | 0.076003  | 4.890317  | -1.241115 | 50 | C  | 0.011182  | 4.898015  | -1.170964 |
| 51 | H  | -0.425354 | 4.317653  | -2.026763 | 51 | H  | -0.451214 | 4.322028  | -1.977637 |
| 52 | H  | -0.499421 | 5.811050  | -1.090659 | 52 | H  | -0.594989 | 5.799237  | -1.024272 |
| 53 | C  | 1.509677  | 5.206457  | -1.644241 | 53 | C  | 1.446309  | 5.260106  | -1.526757 |
| 54 | H  | 2.024960  | 5.783635  | -0.868288 | 54 | H  | 1.921295  | 5.841743  | -0.728898 |
| 55 | H  | 1.521338  | 5.794601  | -2.568310 | 55 | H  | 1.467611  | 5.860239  | -2.442750 |
| 56 | H  | 2.066079  | 4.280399  | -1.816463 | 56 | H  | 2.034843  | 4.353197  | -1.693698 |
| 57 | F  | -1.770239 | -3.722770 | 3.706200  | 57 | F  | -1.800625 | -3.719656 | 3.705257  |
| 58 | F  | 9.519737  | 0.767844  | -0.325479 | 58 | F  | 9.420317  | 0.979330  | -0.483295 |
| 59 | F  | 1.770474  | -3.723854 | -3.705016 | 59 | F  | 1.828580  | -3.830270 | -3.567276 |
| 60 | F  | -9.519825 | 0.767943  | 0.324453  | 60 | F  | -9.495519 | 0.814745  | 0.158259  |
| 61 | Ir | -0.000032 | -0.148744 | 0.000005  | 61 | Ir | 0.048534  | -0.153720 | 0.026381  |
| 62 | N  | 2.003716  | -0.297895 | 0.274013  | 62 | N  | 1.991497  | -0.295117 | 0.275086  |
| 63 | N  | 3.114797  | 0.277955  | -0.258954 | 63 | N  | 3.038717  | 0.292742  | -0.220319 |
| 64 | N  | -2.003762 | -0.298063 | -0.274057 | 64 | N  | -1.976742 | -0.295901 | -0.274733 |
| 65 | N  | -3.114889 | 0.277949  | 0.258646  | 65 | N  | -3.093162 | 0.305543  | 0.215230  |
| 66 | O  | 3.702149  | -1.164015 | 1.316971  | 66 | O  | 3.745525  | -1.237606 | 1.298814  |
| 67 | O  | -3.702112 | -1.164498 | -1.316889 | 67 | O  | -3.658330 | -1.192008 | -1.315767 |
| 68 | S  | 0.103684  | 1.85871   | -1.446205 | 68 | S  | 0.130858  | 1.870792  | -1.410716 |
| 69 | S  | -0.103857 | 1.858705  | 1.446141  | 69 | S  | -0.146052 | 1.831957  | 1.480111  |
| 70 | C  | -0.000057 | 2.788023  | -0.000026 | 70 | C  | -0.036696 | 2.779685  | 0.041529  |
| 71 | N  | -0.000001 | 4.127384  | -0.000017 | 71 | N  | -0.077253 | 4.116134  | 0.058654  |

| <b>3</b> |   |           |           | <b>3</b>  |    |   |           |           |           |
|----------|---|-----------|-----------|-----------|----|---|-----------|-----------|-----------|
| S0       |   |           |           | T1        |    |   |           |           |           |
| 1        | C | -1.376437 | -2.030035 | -1.829034 | 1  | C | -1.385604 | -2.126964 | -1.707219 |
| 2        | C | -0.068472 | -1.644361 | -1.417662 | 2  | C | -0.056947 | -1.674429 | -1.384688 |
| 3        | C | 0.992238  | -2.309955 | -2.037394 | 3  | C | 1.012505  | -2.323852 | -1.994310 |
| 4        | H | 2.026239  | -2.072371 | -1.808329 | 4  | H | 2.039879  | -2.028025 | -1.809888 |
| 5        | C | 0.735257  | -3.285124 | -2.990041 | 5  | C | 0.764750  | -3.358868 | -2.886903 |
| 6        | C | -0.549209 | -3.657810 | -3.384572 | 6  | C | -0.525099 | -3.801744 | -3.202590 |
| 7        | H | -0.679187 | -4.428320 | -4.136356 | 7  | H | -0.645992 | -4.615779 | -3.909758 |
| 8        | C | -1.621405 | -3.013367 | -2.792929 | 8  | C | -1.609520 | -3.187007 | -2.609933 |
| 9        | H | -2.639629 | -3.268166 | -3.074656 | 9  | H | -2.620995 | -3.509872 | -2.837071 |
| 10       | C | -2.365296 | -1.270065 | -1.139225 | 10 | C | -2.360418 | -1.385460 | -1.022796 |
| 11       | C | -4.114824 | -0.377888 | -0.315458 | 11 | C | -4.099499 | -0.352845 | -0.315363 |
| 12       | C | -5.532700 | -0.145162 | -0.127049 | 12 | C | -5.499814 | -0.073823 | -0.145147 |
| 13       | C | -5.952286 | 0.784151  | 0.835406  | 13 | C | -5.905702 | 0.965136  | 0.712048  |
| 14       | H | -5.209140 | 1.305926  | 1.430310  | 14 | H | -5.153799 | 1.536059  | 1.247726  |
| 15       | C | -7.302888 | 1.027752  | 1.028164  | 15 | C | -7.249908 | 1.249425  | 0.879308  |
| 16       | H | -7.651388 | 1.740366  | 1.768185  | 16 | H | -7.584097 | 2.044093  | 1.538102  |
| 17       | C | -8.226596 | 0.335442  | 0.253796  | 17 | C | -8.190123 | 0.490829  | 0.188450  |
| 18       | C | -7.837661 | -0.591100 | -0.703839 | 18 | C | -7.819104 | -0.542911 | -0.661201 |
| 19       | H | -8.592368 | -1.109306 | -1.285769 | 19 | H | -8.584922 | -1.110351 | -1.179481 |
| 20       | C | -6.483455 | -0.830392 | -0.892827 | 20 | C | -6.471241 | -0.825079 | -0.827278 |
| 21       | H | -6.161335 | -1.550231 | -1.638367 | 21 | H | -6.164261 | -1.628609 | -1.488641 |
| 22       | C | 1.400267  | -1.831138 | 1.950914  | 22 | C | 1.409300  | -1.951992 | 1.821875  |
| 23       | C | 0.090526  | -1.496489 | 1.502516  | 23 | C | 0.077421  | -1.542747 | 1.459464  |
| 24       | C | -0.966583 | -2.104417 | 2.184758  | 24 | C | -0.986863 | -2.140911 | 2.127347  |
| 25       | H | -2.001952 | -1.897844 | 1.933078  | 25 | H | -2.016572 | -1.871290 | 1.917521  |
| 26       | C | -0.704438 | -2.978181 | 3.229856  | 26 | C | -0.731017 | -3.086039 | 3.112841  |
| 27       | C | 0.581940  | -3.301837 | 3.660003  | 27 | C | 0.562012  | -3.487278 | 3.467410  |
| 28       | H | 0.715949  | -3.992915 | 4.484738  | 28 | H | 0.689621  | -4.230650 | 4.247455  |
| 29       | C | 1.650556  | -2.712472 | 3.007741  | 29 | C | 1.641480  | -2.921669 | 2.819006  |
| 30       | H | 2.670117  | -2.931291 | 3.313798  | 30 | H | 2.655540  | -3.213650 | 3.074673  |
| 31       | C | 2.385055  | -1.133005 | 1.193705  | 31 | C | 2.378654  | -1.265653 | 1.074617  |
| 32       | C | 4.131228  | -0.293958 | 0.308973  | 32 | C | 4.109416  | -0.271341 | 0.294265  |
| 33       | C | 5.547778  | -0.057402 | 0.115983  | 33 | C | 5.506940  | 0.013921  | 0.112839  |
| 34       | C | 5.967014  | 0.784311  | -0.924084 | 34 | C | 5.907496  | 0.976040  | -0.832308 |
| 35       | H | 5.224644  | 1.236300  | -1.574436 | 35 | H | 5.154219  | 1.481583  | -1.428334 |
| 36       | C | 7.316624  | 1.029307  | -1.122245 | 36 | C | 7.249179  | 1.266417  | -1.009842 |
| 37       | H | 7.665216  | 1.674905  | -1.921343 | 37 | H | 7.579012  | 2.002374  | -1.735611 |
| 38       | C | 8.239297  | 0.426267  | -0.275345 | 38 | C | 8.192458  | 0.590419  | -0.241813 |
| 39       | C | 7.850608  | -0.412641 | 0.760051  | 39 | C | 7.826900  | -0.367229 | 0.694960  |
| 40       | H | 8.604641  | -0.862583 | 1.397013  | 40 | H | 8.594872  | -0.871834 | 1.271759  |
| 41       | C | 6.497541  | -0.653632 | 0.954214  | 41 | C | 6.481659  | -0.655234 | 0.871654  |

|    |    |           |           |           |    |    |           |           |           |
|----|----|-----------|-----------|-----------|----|----|-----------|-----------|-----------|
| 42 | H  | 6.175299  | -1.305225 | 1.760009  | 42 | H  | 6.179190  | -1.399239 | 1.601210  |
| 43 | C  | 2.536198  | 3.666275  | -0.252401 | 43 | C  | 2.544633  | 3.661642  | -0.332988 |
| 44 | H  | 2.993137  | 4.306741  | -1.012981 | 44 | H  | 2.958319  | 4.345166  | -1.080231 |
| 45 | H  | 2.633032  | 2.626306  | -0.583141 | 45 | H  | 2.625192  | 2.639619  | -0.717410 |
| 46 | C  | 3.173918  | 3.880144  | 1.102593  | 46 | C  | 3.245717  | 3.807813  | 0.998526  |
| 47 | H  | 3.064588  | 4.920849  | 1.423253  | 47 | H  | 3.150610  | 4.829367  | 1.379439  |
| 48 | H  | 4.243205  | 3.644029  | 1.049398  | 48 | H  | 4.311013  | 3.578719  | 0.879778  |
| 49 | H  | 2.709731  | 3.233605  | 1.853394  | 49 | H  | 2.823362  | 3.118555  | 1.735672  |
| 50 | C  | -2.564987 | 3.548234  | -0.304873 | 50 | C  | -2.569140 | 3.581069  | -0.189821 |
| 51 | H  | -2.743114 | 3.038212  | -1.259027 | 51 | H  | -2.796200 | 3.096649  | -1.146214 |
| 52 | H  | -2.718144 | 2.824631  | 0.503516  | 52 | H  | -2.700612 | 2.841176  | 0.606532  |
| 53 | C  | -3.457418 | 4.756894  | -0.149479 | 53 | C  | -3.427213 | 4.803820  | 0.030440  |
| 54 | H  | -3.271273 | 5.255441  | 0.806653  | 54 | H  | -3.193719 | 5.274561  | 0.990173  |
| 55 | H  | -4.508039 | 4.448181  | -0.183219 | 55 | H  | -4.484235 | 4.516069  | 0.030645  |
| 56 | H  | -3.281824 | 5.476351  | -0.955113 | 56 | H  | -3.269514 | 5.539078  | -0.764466 |
| 57 | F  | 1.772946  | -3.904732 | -3.567516 | 57 | F  | 1.802678  | -3.964140 | -3.480492 |
| 58 | F  | -9.528399 | 0.568596  | 0.437818  | 58 | F  | -9.488210 | 0.765471  | 0.349829  |
| 59 | F  | -1.738809 | -3.543498 | 3.865949  | 59 | F  | -1.764474 | -3.640696 | 3.761325  |
| 60 | F  | 9.540046  | 0.660767  | -0.464626 | 60 | F  | 9.488013  | 0.870759  | -0.413406 |
| 61 | Ir | 0.006981  | -0.177265 | -0.027966 | 61 | Ir | 0.003877  | -0.192057 | -0.028579 |
| 62 | N  | -2.001998 | -0.363256 | -0.260217 | 62 | N  | -1.990387 | -0.372652 | -0.225152 |
| 63 | N  | -3.116177 | 0.208048  | 0.272602  | 63 | N  | -3.078335 | 0.282808  | 0.201583  |
| 64 | N  | 2.018551  | -0.320468 | 0.228234  | 64 | N  | 2.000998  | -0.334514 | 0.186707  |
| 65 | N  | 3.130803  | 0.217655  | -0.342344 | 65 | N  | 3.083328  | 0.299730  | -0.284882 |
| 66 | O  | -3.701932 | -1.320336 | -1.218282 | 66 | O  | -3.709244 | -1.416553 | -1.100049 |
| 67 | O  | 3.721370  | -1.154317 | 1.290965  | 67 | O  | 3.727404  | -1.268919 | 1.164826  |
| 68 | O  | 1.150117  | 4.051768  | -0.221103 | 68 | O  | 1.157647  | 4.038476  | -0.216171 |
| 69 | O  | -1.205181 | 4.007508  | -0.279437 | 69 | O  | -1.197476 | 4.013857  | -0.213736 |
| 70 | P  | -0.007068 | 2.937426  | -0.19259  | 70 | P  | -0.007168 | 2.941074  | -0.168195 |
| 71 | S  | -0.059305 | 1.82464   | 1.485677  | 71 | S  | -0.016495 | 1.806707  | 1.500923  |
| 72 | S  | 0.067206  | 1.658065  | -1.744386 | 72 | S  | 0.006829  | 1.667215  | -1.731375 |

| <b>4a</b> |    |           |           |           | <b>4a</b> |    |           |           |           |
|-----------|----|-----------|-----------|-----------|-----------|----|-----------|-----------|-----------|
| S0        |    |           |           |           | T1        |    |           |           |           |
| 1         | Ir | -0.424794 | -1.036331 | 0.026723  | 1         | Ir | -0.540328 | -0.977471 | -0.021268 |
| 2         | O  | 0.450136  | -2.887657 | 0.344995  | 2         | O  | 0.151181  | -2.900762 | 0.253898  |
| 3         | O  | -0.097137 | -1.127261 | -1.981895 | 3         | O  | -0.229831 | -1.067450 | -2.030929 |
| 4         | N  | -1.451193 | 0.645826  | -0.278623 | 4         | N  | -1.354733 | 0.787793  | -0.275883 |
| 5         | N  | -1.104631 | 1.903732  | -0.192425 | 5         | N  | -0.864443 | 1.985701  | -0.189788 |
| 6         | N  | 1.355286  | -0.232197 | 0.431863  | 6         | N  | 1.322332  | -0.358649 | 0.414626  |
| 7         | N  | 2.381074  | 0.028172  | -0.334569 | 7         | N  | 2.377366  | -0.158649 | -0.329824 |
| 8         | C  | -2.760352 | 0.499320  | -0.639075 | 8         | C  | -2.753075 | 0.789191  | -0.590319 |
| 9         | C  | -2.207745 | 2.623476  | -0.517662 | 9         | C  | -1.909516 | 2.832315  | -0.470172 |
| 10        | C  | 1.589329  | 0.085029  | 1.733249  | 10        | C  | 1.573067  | -0.130882 | 1.732507  |
| 11        | C  | 3.332710  | 0.550766  | 0.479500  | 11        | C  | 3.366938  | 0.227511  | 0.515232  |
| 12        | C  | 1.832865  | -4.722593 | -0.080263 | 12        | C  | 1.360476  | -4.848668 | -0.192213 |
| 13        | H  | 2.605385  | -4.440899 | 0.644389  | 13        | H  | 2.134070  | -4.653766 | 0.559177  |
| 14        | H  | 1.119635  | -5.367481 | 0.443778  | 14        | H  | 0.578933  | -5.441250 | 0.294914  |
| 15        | H  | 2.298928  | -5.281635 | -0.894406 | 15        | H  | 1.797487  | -5.425825 | -1.009698 |
| 16        | C  | 1.136170  | -3.477340 | -0.559964 | 16        | C  | 0.786511  | -3.537526 | -0.655951 |
| 17        | C  | 1.284051  | -3.082182 | -1.890024 | 17        | C  | 0.972995  | -3.136859 | -1.979145 |
| 18        | H  | 1.932735  | -3.691105 | -2.508796 | 18        | H  | 1.559218  | -3.794490 | -2.609873 |
| 19        | C  | 0.698887  | -1.965986 | -2.510964 | 19        | C  | 0.480440  | -1.968074 | -2.580955 |
| 20        | C  | 1.028529  | -1.673125 | -3.946669 | 20        | C  | 0.806725  | -1.690639 | -4.020442 |
| 21        | H  | 1.796242  | -0.889622 | -3.959090 | 21        | H  | 1.603536  | -0.937438 | -4.046592 |
| 22        | H  | 1.413960  | -2.548904 | -4.473868 | 22        | H  | 1.149101  | -2.582718 | -4.549628 |
| 23        | H  | 0.146646  | -1.282006 | -4.460841 | 23        | H  | -0.066340 | -1.268020 | -4.525125 |
| 24        | C  | -3.250002 | -0.847759 | -0.700467 | 24        | C  | -3.370986 | -0.469119 | -0.642144 |
| 25        | C  | -2.658919 | -3.088873 | -0.357140 | 25        | C  | -2.975751 | -2.794810 | -0.394804 |
| 26        | H  | -1.861179 | -3.767060 | -0.070703 | 26        | H  | -2.252978 | -3.575932 | -0.175633 |
| 27        | C  | -3.927786 | -3.528155 | -0.693785 | 27        | C  | -4.294553 | -3.086051 | -0.673999 |
| 28        | C  | -4.886798 | -2.576126 | -1.049443 | 28        | C  | -5.208259 | -2.014030 | -0.953863 |
| 29        | H  | -5.891770 | -2.884948 | -1.323219 | 29        | H  | -6.249190 | -2.220023 | -1.178943 |
| 30        | C  | -4.549380 | -1.234469 | -1.052908 | 30        | C  | -4.730067 | -0.731737 | -0.934433 |
| 31        | H  | -5.271281 | -0.472527 | -1.326844 | 31        | H  | -5.383128 | 0.111391  | -1.144451 |
| 32        | C  | -2.186481 | 4.090588  | -0.526302 | 32        | C  | -1.703194 | 4.273205  | -0.471841 |
| 33        | C  | -3.155826 | 4.807919  | -1.244095 | 33        | C  | -2.724589 | 5.134171  | -0.908315 |
| 34        | C  | -3.126183 | 6.194559  | -1.222301 | 34        | C  | -2.501512 | 6.503511  | -0.898229 |
| 35        | H  | -3.867294 | 6.768545  | -1.772958 | 35        | H  | -3.274592 | 7.189424  | -1.233703 |
| 36        | C  | -2.125076 | 6.833383  | -0.496914 | 36        | C  | -1.270998 | 6.976552  | -0.455850 |
| 37        | C  | -1.201491 | 6.034371  | 0.172491  | 37        | C  | -0.318025 | 6.041464  | -0.043324 |
| 38        | H  | -0.397661 | 6.493227  | 0.748010  | 38        | H  | 0.657901  | 6.374423  | 0.307881  |
| 39        | C  | 0.514824  | -0.207151 | 2.635546  | 39        | C  | 0.471032  | -0.364462 | 2.619430  |
| 40        | C  | -1.647088 | -1.091486 | 2.789873  | 40        | C  | -1.770803 | -1.048330 | 2.731370  |
| 41        | H  | -2.478746 | -1.534207 | 2.253544  | 41        | H  | -2.634940 | -1.381132 | 2.167185  |



|    |   |           |           |           |    |   |           |           |           |
|----|---|-----------|-----------|-----------|----|---|-----------|-----------|-----------|
| 42 | C | -1.695576 | -0.870139 | 4.154371  | 42 | C | -1.798255 | -0.900531 | 4.106001  |
| 43 | C | -0.586355 | -0.291812 | 4.774390  | 43 | C | -0.638978 | -0.466061 | 4.752900  |
| 44 | H | -0.590630 | -0.099611 | 5.843452  | 44 | H | -0.626200 | -0.338165 | 5.831580  |
| 45 | C | 0.518951  | 0.039541  | 4.012972  | 45 | C | 0.495282  | -0.198355 | 4.009243  |
| 46 | H | 1.395093  | 0.496894  | 4.459657  | 46 | H | 1.411045  | 0.142609  | 4.479833  |
| 47 | C | 4.636554  | 0.970158  | -0.044180 | 47 | C | 4.710410  | 0.544427  | 0.020149  |
| 48 | C | 6.197142  | 0.876249  | -1.716525 | 48 | C | 6.259898  | 0.404982  | -1.659645 |
| 49 | H | 6.461429  | 0.476696  | -2.695754 | 49 | H | 6.484915  | 0.048912  | -2.665086 |
| 50 | C | 7.081838  | 1.715918  | -1.045006 | 50 | C | 7.224539  | 1.099133  | -0.934132 |
| 51 | C | 6.690342  | 2.203444  | 0.198455  | 51 | C | 6.880792  | 1.536709  | 0.341577  |
| 52 | H | 7.335639  | 2.872304  | 0.762525  | 52 | H | 7.590391  | 2.092678  | 0.949316  |
| 53 | C | 5.453369  | 1.832911  | 0.703447  | 53 | C | 5.609757  | 1.263071  | 0.823560  |
| 54 | H | -3.906172 | 4.279531  | -1.824579 | 54 | H | -3.668939 | 4.731290  | -1.258990 |
| 55 | H | 5.107573  | 2.220022  | 1.656979  | 55 | H | 5.303579  | 1.615411  | 1.803764  |
| 56 | H | -2.056094 | 7.916182  | -0.453176 | 56 | H | -1.047541 | 8.038790  | -0.430447 |
| 57 | H | -4.155843 | -4.588184 | -0.680972 | 57 | H | -4.621601 | -4.119920 | -0.682536 |
| 58 | H | -2.584348 | -1.141315 | 4.713130  | 58 | H | -2.708112 | -1.120293 | 4.653180  |
| 59 | H | 8.038509  | 1.980228  | -1.485489 | 59 | H | 8.205565  | 1.291956  | -1.357832 |
| 60 | C | -3.285772 | 1.777199  | -0.812572 | 60 | C | -3.101975 | 2.127063  | -0.729433 |
| 61 | C | 2.877172  | 0.608685  | 1.805065  | 61 | C | 2.904740  | 0.261558  | 1.839217  |
| 62 | N | -0.577601 | -0.777367 | 2.046245  | 62 | N | -0.672897 | -0.790150 | 2.006695  |
| 63 | N | 5.012128  | 0.501263  | -1.243693 | 63 | N | 5.040492  | 0.123903  | -1.210186 |
| 64 | N | -2.328349 | -1.791254 | -0.356353 | 64 | N | -2.489460 | -1.545755 | -0.358944 |
| 65 | N | -1.221823 | 4.704993  | 0.173009  | 65 | N | -0.513412 | 4.730883  | -0.045043 |
| 66 | H | -4.298378 | 2.049470  | -1.075833 | 66 | H | -4.078587 | 2.527756  | -0.953865 |
| 67 | H | 3.407142  | 0.953104  | 2.681842  | 67 | H | 3.455770  | 0.507325  | 2.736068  |

| <b>4b</b> |    |           |           |           | <b>4b</b> |    |           |           |           |
|-----------|----|-----------|-----------|-----------|-----------|----|-----------|-----------|-----------|
| S0        |    |           |           |           | T1        |    |           |           |           |
| 1         | Ir | -0.103004 | -1.093461 | -0.011393 | 1         | Ir | -0.113497 | -1.088784 | -0.042460 |
| 2         | O  | 1.107017  | -2.762047 | 0.174381  | 2         | O  | 1.078962  | -2.766071 | 0.099391  |
| 3         | O  | -0.225767 | -1.290475 | -2.035141 | 3         | O  | -0.262768 | -1.246175 | -2.067288 |
| 4         | N  | -1.417046 | 0.402266  | -0.149271 | 4         | N  | -1.391623 | 0.421132  | -0.150090 |
| 5         | N  | -1.237547 | 1.701732  | -0.219031 | 5         | N  | -1.202174 | 1.718656  | -0.224468 |
| 6         | N  | 1.572707  | -0.004375 | -0.062819 | 6         | N  | 1.581299  | -0.008064 | -0.080873 |
| 7         | N  | 2.336946  | 0.346487  | -1.071613 | 7         | N  | 2.345525  | 0.372998  | -1.079114 |
| 8         | C  | -2.743216 | 0.014828  | -0.183083 | 8         | C  | -2.769712 | 0.026556  | -0.150832 |
| 9         | C  | -2.486702 | 2.213252  | -0.311130 | 9         | C  | -2.479461 | 2.235038  | -0.296423 |
| 10        | C  | 2.023536  | 0.423762  | 1.164349  | 10        | C  | 2.041335  | 0.374332  | 1.158650  |
| 11        | C  | 3.343277  | 1.049434  | -0.501939 | 11        | C  | 3.360299  | 1.047298  | -0.489607 |
| 12        | C  | 2.615682  | -4.420073 | -0.483639 | 12        | C  | 2.564372  | -4.426809 | -0.600197 |
| 13        | H  | 3.481773  | -3.974055 | 0.018523  | 13        | H  | 3.428957  | -4.003092 | -0.076811 |
| 14        | H  | 2.152745  | -5.111820 | 0.227944  | 14        | H  | 2.090266  | -5.137847 | 0.084627  |
| 15        | H  | 2.961193  | -4.975165 | -1.358234 | 15        | H  | 2.912541  | -4.956347 | -1.489384 |
| 16        | C  | 1.641765  | -3.329450 | -0.840299 | 16        | C  | 1.599491  | -3.320157 | -0.929619 |
| 17        | C  | 1.405671  | -3.037734 | -2.184932 | 17        | C  | 1.351774  | -3.003620 | -2.266556 |
| 18        | H  | 1.967299  | -3.612451 | -2.912005 | 18        | H  | 1.897138  | -3.573653 | -3.009381 |
| 19        | C  | 0.528055  | -2.069374 | -2.700218 | 19        | C  | 0.471785  | -2.024070 | -2.754793 |
| 20        | C  | 0.440106  | -1.878038 | -4.187616 | 20        | C  | 0.353634  | -1.818234 | -4.238431 |
| 21        | H  | 1.000314  | -0.971646 | -4.447272 | 21        | H  | 0.877746  | -0.890838 | -4.498473 |
| 22        | H  | 0.858199  | -2.720585 | -4.742879 | 22        | H  | 0.788495  | -2.641028 | -4.810008 |
| 23        | H  | -0.600611 | -1.715544 | -4.481245 | 23        | H  | -0.697344 | -1.689275 | -4.512324 |
| 24        | C  | -3.007880 | -1.383883 | -0.069599 | 24        | C  | -3.049784 | -1.332973 | -0.027732 |
| 25        | C  | -2.003959 | -3.479641 | 0.216215  | 25        | C  | -2.035672 | -3.456366 | 0.219046  |
| 26        | H  | -1.064770 | -4.010579 | 0.334863  | 26        | H  | -1.112715 | -4.023035 | 0.304235  |
| 27        | C  | -3.229681 | -4.122097 | 0.204198  | 27        | C  | -3.272867 | -4.075049 | 0.250221  |
| 28        | C  | -4.384282 | -3.349663 | 0.046311  | 28        | C  | -4.466486 | -3.285549 | 0.134418  |
| 29        | H  | -5.362236 | -3.822372 | 0.029626  | 29        | H  | -5.443498 | -3.755503 | 0.152905  |
| 30        | C  | -4.277112 | -1.977613 | -0.090569 | 30        | C  | -4.334218 | -1.931289 | -0.003579 |
| 31        | H  | -5.151632 | -1.347927 | -0.216809 | 31        | H  | -5.202889 | -1.284963 | -0.097515 |
| 32        | C  | -3.229193 | 3.445173  | -0.414728 | 32        | C  | -3.198101 | 3.467916  | -0.388388 |
| 33        | C  | -4.584513 | 3.025757  | -0.452487 | 33        | C  | -4.564124 | 3.067680  | -0.399798 |
| 34        | C  | -5.611144 | 3.939043  | -0.552802 | 34        | C  | -5.578550 | 4.003872  | -0.484909 |
| 35        | H  | -6.652186 | 3.632891  | -0.584194 | 35        | H  | -6.625422 | 3.717999  | -0.496756 |
| 36        | C  | -5.218978 | 5.277169  | -0.611105 | 36        | C  | -5.159309 | 5.327233  | -0.553846 |
| 37        | C  | -3.861115 | 5.607287  | -0.565606 | 37        | C  | -3.787072 | 5.638122  | -0.533686 |
| 38        | H  | -3.561543 | 6.652929  | -0.610553 | 38        | H  | -3.476324 | 6.679896  | -0.587243 |
| 39        | C  | 1.235584  | 0.040095  | 2.289965  | 39        | C  | 1.258880  | -0.039359 | 2.278067  |
| 40        | C  | -0.672313 | -1.133878 | 2.961152  | 40        | C  | -0.655274 | -1.220166 | 2.929189  |
| 41        | H  | -1.522448 | -1.727231 | 2.644305  | 41        | H  | -1.511519 | -1.795646 | 2.596060  |

|    |   |           |           |           |    |   |           |           |           |
|----|---|-----------|-----------|-----------|----|---|-----------|-----------|-----------|
| 42 | C | -0.451460 | -0.828860 | 4.291819  | 42 | C | -0.415445 | -0.964812 | 4.266930  |
| 43 | C | 0.664376  | -0.056307 | 4.623016  | 43 | C | 0.711729  | -0.214690 | 4.612294  |
| 44 | H | 0.866086  | 0.204031  | 5.658033  | 44 | H | 0.928500  | 0.004671  | 5.653823  |
| 45 | C | 1.509957  | 0.379365  | 3.620396  | 45 | C | 1.551080  | 0.249082  | 3.616972  |
| 46 | H | 2.383209  | 0.986169  | 3.835282  | 46 | H | 2.434088  | 0.836973  | 3.844352  |
| 47 | C | 4.559504  | 1.768450  | -0.787269 | 47 | C | 4.580760  | 1.767350  | -0.754134 |
| 48 | C | 6.338408  | 2.742948  | -1.778929 | 48 | C | 6.362720  | 2.765011  | -1.717462 |
| 49 | H | 6.875574  | 2.957275  | -2.701323 | 49 | H | 6.897694  | 3.008669  | -2.633850 |
| 50 | C | 6.843065  | 3.213962  | -0.563336 | 50 | C | 6.875753  | 3.188231  | -0.487922 |
| 51 | C | 6.161441  | 2.942632  | 0.624055  | 51 | C | 6.196749  | 2.879044  | 0.691755  |
| 52 | H | 6.513144  | 3.286265  | 1.591870  | 52 | H | 6.554863  | 3.184795  | 1.669891  |
| 53 | C | 5.004846  | 2.206763  | 0.487541  | 53 | C | 5.034402  | 2.156786  | 0.533718  |
| 54 | H | -5.962865 | 6.063733  | -0.691485 | 54 | H | -5.887246 | 6.129571  | -0.623279 |
| 55 | H | -3.277548 | -5.199902 | 0.312592  | 55 | H | -3.322973 | -5.153061 | 0.356770  |
| 56 | H | -1.141406 | -1.186466 | 5.047886  | 56 | H | -1.098331 | -1.345299 | 5.018238  |
| 57 | H | 7.763535  | 3.789339  | -0.548158 | 57 | H | 7.800611  | 3.755836  | -0.455832 |
| 58 | C | -3.446626 | 1.206696  | -0.294886 | 58 | C | -3.443434 | 1.246080  | -0.260205 |
| 59 | C | 3.187953  | 1.123730  | 0.878883  | 59 | C | 3.210756  | 1.073994  | 0.893519  |
| 60 | N | 0.144392  | -0.720048 | 1.982168  | 60 | N | 0.154852  | -0.775113 | 1.957940  |
| 61 | N | 5.218571  | 2.030107  | -1.914598 | 61 | N | 5.237246  | 2.065390  | -1.874014 |
| 62 | N | -1.892580 | -2.150996 | 0.086940  | 62 | N | -1.880611 | -2.134581 | 0.091886  |
| 63 | N | -2.865190 | 4.724828  | -0.468952 | 63 | N | -2.808599 | 4.745472  | -0.452974 |
| 64 | O | 4.172884  | 1.816041  | 1.512559  | 64 | O | 4.203464  | 1.736174  | 1.547527  |
| 65 | O | -4.727454 | 1.657383  | -0.378255 | 65 | O | -4.724758 | 1.716498  | -0.319461 |

| <b>4c</b> |    |           |           |           | <b>4c</b> |    |           |           |           |
|-----------|----|-----------|-----------|-----------|-----------|----|-----------|-----------|-----------|
| S0        |    |           |           |           | T1        |    |           |           |           |
| 1         | Ir | -0.133521 | -1.200303 | -0.011684 | 1         | Ir | -0.136145 | -1.197486 | -0.046390 |
| 2         | O  | 1.076366  | -2.868906 | 0.173298  | 2         | O  | 1.062264  | -2.872240 | 0.069251  |
| 3         | O  | -0.211004 | -1.363920 | -2.040657 | 3         | O  | -0.252482 | -1.293366 | -2.077368 |
| 4         | N  | -1.451552 | 0.290188  | -0.150408 | 4         | N  | -1.434315 | 0.307332  | -0.134121 |
| 5         | N  | -1.283033 | 1.589551  | -0.186404 | 5         | N  | -1.266197 | 1.608023  | -0.169683 |
| 6         | N  | 1.541502  | -0.111645 | -0.006473 | 6         | N  | 1.554237  | -0.113796 | -0.024864 |
| 7         | N  | 2.329758  | 0.256142  | -0.986527 | 7         | N  | 2.334990  | 0.297151  | -0.994349 |
| 8         | C  | -2.772502 | -0.089070 | -0.218207 | 8         | C  | -2.793993 | -0.081843 | -0.175284 |
| 9         | C  | -2.528677 | 2.101888  | -0.289123 | 9         | C  | -2.537121 | 2.126512  | -0.253107 |
| 10        | C  | 1.976293  | 0.293844  | 1.227464  | 10        | C  | 2.005040  | 0.232917  | 1.221856  |
| 11        | C  | 3.328301  | 0.942176  | -0.388519 | 11        | C  | 3.343669  | 0.949931  | -0.376062 |
| 12        | C  | 2.602729  | -4.513163 | -0.478373 | 12        | C  | 2.557447  | -4.512400 | -0.656674 |
| 13        | H  | 3.459799  | -4.071897 | 0.043162  | 13        | H  | 3.418137  | -4.099611 | -0.118297 |
| 14        | H  | 2.128812  | -5.213414 | 0.217435  | 14        | H  | 2.079309  | -5.238550 | 0.009193  |
| 15        | H  | 2.963522  | -5.057631 | -1.353480 | 15        | H  | 2.912223  | -5.021964 | -1.554900 |
| 16        | C  | 1.633910  | -3.419282 | -0.838677 | 16        | C  | 1.594320  | -3.398907 | -0.968324 |
| 17        | C  | 1.426531  | -3.106167 | -2.183064 | 17        | C  | 1.362419  | -3.047963 | -2.299450 |
| 18        | H  | 2.005641  | -3.667405 | -2.906957 | 18        | H  | 1.918155  | -3.598027 | -3.049690 |
| 19        | C  | 0.559910  | -2.129540 | -2.701603 | 19        | C  | 0.491982  | -2.052924 | -2.774246 |
| 20        | C  | 0.508693  | -1.910286 | -4.186735 | 20        | C  | 0.402095  | -1.803504 | -4.253215 |
| 21        | H  | 1.086967  | -1.006975 | -4.416029 | 21        | H  | 0.954064  | -0.883166 | -4.478855 |
| 22        | H  | 0.929396  | -2.747971 | -4.747437 | 22        | H  | 0.826149  | -2.620819 | -4.840700 |
| 23        | H  | -0.522627 | -1.728683 | -4.501289 | 23        | H  | -0.640663 | -1.640233 | -4.539465 |
| 24        | C  | -3.036968 | -1.491710 | -0.137553 | 24        | C  | -3.074447 | -1.443630 | -0.096127 |
| 25        | C  | -2.031707 | -3.590554 | 0.133413  | 25        | C  | -2.055479 | -3.569983 | 0.122247  |
| 26        | H  | -1.093023 | -4.119807 | 0.263352  | 26        | H  | -1.132073 | -4.135268 | 0.213108  |
| 27        | C  | -3.254293 | -4.237746 | 0.084262  | 27        | C  | -3.291711 | -4.195254 | 0.114911  |
| 28        | C  | -4.407556 | -3.466643 | -0.085558 | 28        | C  | -4.486810 | -3.407602 | -0.007905 |
| 29        | H  | -5.383396 | -3.941688 | -0.131935 | 29        | H  | -5.461869 | -3.881601 | -0.020565 |
| 30        | C  | -4.302068 | -2.091896 | -0.196414 | 30        | C  | -4.356595 | -2.051259 | -0.111842 |
| 31        | H  | -5.179960 | -1.468771 | -0.331673 | 31        | H  | -5.230215 | -1.411565 | -0.208382 |
| 32        | C  | -3.091560 | 3.426010  | -0.366919 | 32        | C  | -3.083752 | 3.446806  | -0.320401 |
| 33        | C  | -4.506521 | 3.347239  | -0.454857 | 33        | C  | -4.504980 | 3.377238  | -0.385931 |
| 34        | C  | -5.251917 | 4.514773  | -0.540071 | 34        | C  | -5.242305 | 4.556156  | -0.460744 |
| 35        | H  | -6.336083 | 4.493471  | -0.609771 | 35        | H  | -6.327283 | 4.545707  | -0.513800 |
| 36        | C  | -4.552933 | 5.716913  | -0.532489 | 36        | C  | -4.530688 | 5.745338  | -0.464369 |
| 37        | C  | -3.157824 | 5.693708  | -0.439962 | 37        | C  | -3.127615 | 5.711693  | -0.393069 |
| 38        | H  | -2.599799 | 6.628755  | -0.432020 | 38        | H  | -2.565923 | 6.644372  | -0.394457 |
| 39        | C  | 1.164278  | -0.105820 | 2.332438  | 39        | C  | 1.205109  | -0.209420 | 2.320205  |
| 40        | C  | -0.763845 | -1.282382 | 2.944608  | 40        | C  | -0.724701 | -1.398732 | 2.909912  |
| 41        | H  | -1.610133 | -1.865365 | 2.599448  | 41        | H  | -1.578488 | -1.960630 | 2.548404  |

|    |   |           |           |           |    |   |           |           |           |
|----|---|-----------|-----------|-----------|----|---|-----------|-----------|-----------|
| 42 | C | -0.570755 | -1.001062 | 4.285016  | 42 | C | -0.506647 | -1.180286 | 4.258271  |
| 43 | C | 0.541073  | -0.240005 | 4.652281  | 43 | C | 0.617574  | -0.445457 | 4.641370  |
| 44 | H | 0.722398  | 0.002527  | 5.695338  | 44 | H | 0.818816  | -0.254127 | 5.691475  |
| 45 | C | 1.409389  | 0.208444  | 3.674687  | 45 | C | 1.474391  | 0.040759  | 3.671499  |
| 46 | H | 2.278154  | 0.808182  | 3.924785  | 46 | H | 2.353709  | 0.618969  | 3.935229  |
| 47 | C | 4.519541  | 1.617901  | -0.833853 | 47 | C | 4.532707  | 1.642070  | -0.801792 |
| 48 | C | 6.092316  | 2.405473  | -2.269000 | 48 | C | 6.092360  | 2.493479  | -2.215093 |
| 49 | H | 6.435331  | 2.489529  | -3.299199 | 49 | H | 6.423999  | 2.626149  | -3.243929 |
| 50 | C | 6.836060  | 2.989518  | -1.239276 | 50 | C | 6.850204  | 3.024303  | -1.167040 |
| 51 | C | 6.386948  | 2.872668  | 0.071735  | 51 | C | 6.415195  | 2.845792  | 0.141838  |
| 52 | H | 6.938819  | 3.312753  | 0.897899  | 52 | H | 6.978112  | 3.243282  | 0.982047  |
| 53 | C | 5.206647  | 2.172795  | 0.278481  | 53 | C | 5.234489  | 2.140995  | 0.327997  |
| 54 | H | -5.079594 | 6.664073  | -0.597127 | 54 | H | -5.046716 | 6.698724  | -0.521275 |
| 55 | H | -3.300188 | -5.317385 | 0.173356  | 55 | H | -3.339062 | -5.275525 | 0.196364  |
| 56 | H | -1.278733 | -1.367405 | 5.019894  | 56 | H | -1.204038 | -1.576744 | 4.987674  |
| 57 | H | 7.752179  | 3.526610  | -1.465021 | 57 | H | 7.766127  | 3.568113  | -1.377000 |
| 58 | C | -3.503143 | 1.093388  | -0.315835 | 58 | C | -3.509694 | 1.136811  | -0.265601 |
| 59 | C | 3.157023  | 0.998663  | 1.003024  | 59 | C | 3.187246  | 0.941741  | 1.018286  |
| 60 | N | 0.075580  | -0.856837 | 1.990899  | 60 | N | 0.102933  | -0.933250 | 1.964151  |
| 61 | N | 4.960041  | 1.731764  | -2.089853 | 61 | N | 4.959558  | 1.815669  | -2.055784 |
| 62 | N | -1.922994 | -2.260002 | 0.029399  | 62 | N | -1.903175 | -2.247482 | 0.026822  |
| 63 | N | -2.428641 | 4.585158  | -0.358022 | 63 | N | -2.407279 | 4.602974  | -0.322238 |
| 64 | S | -5.126842 | 1.695303  | -0.440216 | 64 | S | -5.128517 | 1.741532  | -0.360749 |
| 65 | S | 4.413834  | 1.869928  | 1.824566  | 65 | S | 4.457199  | 1.767664  | 1.866533  |

| <b>5</b>  |    |           |           |           | <b>5</b>  |    |           |           |           |
|-----------|----|-----------|-----------|-----------|-----------|----|-----------|-----------|-----------|
| <b>S0</b> |    |           |           |           | <b>T1</b> |    |           |           |           |
| 1         | Ir | -0.182752 | -0.760091 | 0.016675  | 1         | Ir | -0.218666 | -0.747337 | -0.018852 |
| 2         | O  | 0.827209  | -2.538955 | 0.320079  | 2         | O  | 0.713044  | -2.563538 | 0.256396  |
| 3         | O  | -0.156868 | -0.980498 | -2.006922 | 3         | O  | -0.209302 | -0.946370 | -2.044840 |
| 4         | N  | -1.338562 | 0.846365  | -0.247116 | 4         | N  | -1.267097 | 0.898744  | -0.255646 |
| 5         | N  | -1.123263 | 2.147606  | -0.349758 | 5         | N  | -0.996771 | 2.175002  | -0.352897 |
| 6         | N  | 1.591705  | 0.156267  | 0.119776  | 6         | N  | 1.602058  | 0.101659  | 0.110786  |
| 7         | N  | 2.534567  | 0.478096  | -0.755393 | 7         | N  | 2.565411  | 0.420231  | -0.743715 |
| 8         | C  | -2.660146 | 0.616344  | -0.372466 | 8         | C  | -2.678327 | 0.722012  | -0.344073 |
| 9         | C  | -2.354983 | 2.663628  | -0.541829 | 9         | C  | -2.231069 | 2.756866  | -0.512647 |
| 10        | C  | 1.995021  | 0.526153  | 1.345252  | 10        | C  | 2.005840  | 0.419844  | 1.351139  |
| 11        | C  | 3.488555  | 1.049432  | 0.003031  | 11        | C  | 3.530312  | 0.934710  | 0.041183  |
| 12        | C  | 2.197956  | -4.360652 | -0.189194 | 12        | C  | 2.015155  | -4.430020 | -0.267411 |
| 13        | H  | 3.059540  | -3.998268 | 0.383095  | 13        | H  | 2.876406  | -4.108237 | 0.328962  |
| 14        | H  | 1.605437  | -4.987464 | 0.485439  | 14        | H  | 1.388525  | -5.050730 | 0.381643  |
| 15        | H  | 2.556443  | -4.964643 | -1.025350 | 15        | H  | 2.369280  | -5.028080 | -1.109551 |
| 16        | C  | 1.378213  | -3.181174 | -0.638496 | 16        | C  | 1.242531  | -3.216477 | -0.707050 |
| 17        | C  | 1.282575  | -2.894858 | -2.002402 | 17        | C  | 1.156285  | -2.913430 | -2.067696 |
| 18        | H  | 1.830351  | -3.545142 | -2.674311 | 18        | H  | 1.673855  | -3.579405 | -2.747859 |
| 19        | C  | 0.553120  | -1.853866 | -2.599176 | 19        | C  | 0.458036  | -1.844415 | -2.650431 |
| 20        | C  | 0.586226  | -1.697462 | -4.093554 | 20        | C  | 0.470713  | -1.685028 | -4.144801 |
| 21        | H  | 1.222662  | -0.838127 | -4.335961 | 21        | H  | 1.090885  | -0.816806 | -4.396585 |
| 22        | H  | 0.981474  | -2.582035 | -4.597676 | 22        | H  | 0.869225  | -2.564573 | -4.654803 |
| 23        | H  | -0.418038 | -1.474670 | -4.465038 | 23        | H  | -0.542290 | -1.477505 | -4.501911 |
| 24        | C  | -3.094321 | -0.748858 | -0.261330 | 24        | C  | -3.155807 | -0.580793 | -0.224222 |
| 25        | C  | -2.352303 | -2.930477 | 0.120907  | 25        | C  | -2.476954 | -2.821838 | 0.094509  |
| 26        | H  | -1.492709 | -3.563573 | 0.316578  | 26        | H  | -1.654001 | -3.514824 | 0.245729  |
| 27        | C  | -3.640741 | -3.429749 | 0.025013  | 27        | C  | -3.790057 | -3.257065 | 0.043739  |
| 28        | C  | -4.687769 | -2.538457 | -0.225813 | 28        | C  | -4.843860 | -2.305307 | -0.151637 |
| 29        | H  | -5.708482 | -2.901114 | -0.308006 | 29        | H  | -5.877686 | -2.630985 | -0.195736 |
| 30        | C  | -4.415597 | -1.188662 | -0.369501 | 30        | C  | -4.513811 | -0.985705 | -0.283480 |
| 31        | H  | -5.189284 | -0.454132 | -0.564815 | 31        | H  | -5.262816 | -0.214361 | -0.435885 |
| 32        | C  | 1.087394  | 0.238968  | 2.422480  | 32        | C  | 1.085005  | 0.127387  | 2.416723  |
| 33        | C  | -0.986446 | -0.695161 | 2.941246  | 33        | C  | -1.021122 | -0.761344 | 2.902796  |
| 34        | H  | -1.875746 | -1.186739 | 2.563580  | 34        | H  | -1.922610 | -1.211110 | 2.502138  |
| 35        | C  | -0.826165 | -0.405995 | 4.285715  | 35        | C  | -0.848911 | -0.530978 | 4.256929  |
| 36        | C  | 0.344984  | 0.229877  | 4.701765  | 36        | C  | 0.342727  | 0.050965  | 4.694563  |
| 37        | H  | 0.497948  | 0.470375  | 5.749843  | 37        | H  | 0.504749  | 0.242829  | 5.751349  |
| 38        | C  | 1.308677  | 0.554777  | 3.762888  | 38        | C  | 1.316829  | 0.382132  | 3.768587  |
| 39        | H  | 2.235341  | 1.053702  | 4.024521  | 39        | H  | 2.260548  | 0.836672  | 4.049410  |
| 40        | H  | -3.817313 | -4.493278 | 0.142719  | 40        | H  | -4.002128 | -4.315168 | 0.149926  |
| 41        | H  | -1.607809 | -0.673233 | 4.988257  | 41        | H  | -1.636314 | -0.803423 | 4.950935  |

|    |   |           |           |           |    |   |           |           |           |
|----|---|-----------|-----------|-----------|----|---|-----------|-----------|-----------|
| 42 | N | -0.055929 | -0.387813 | 2.027606  | 42 | N | -0.080708 | -0.442123 | 2.002805  |
| 43 | N | -2.083448 | -1.625563 | -0.015558 | 43 | N | -2.127822 | -1.537446 | -0.023697 |
| 44 | N | 3.196077  | 1.100656  | 1.320581  | 44 | N | 3.225535  | 0.954571  | 1.356733  |
| 45 | N | -3.341992 | 1.747103  | -0.562253 | 45 | N | -3.272852 | 1.910967  | -0.512032 |
| 46 | C | -2.563875 | 4.147797  | -0.716447 | 46 | C | -2.345616 | 4.242954  | -0.672621 |
| 47 | C | -2.033117 | 4.877090  | 0.526461  | 47 | C | -1.745803 | 4.912991  | 0.576112  |
| 48 | C | -1.781807 | 4.618637  | -1.951632 | 48 | C | -1.530889 | 4.660383  | -1.909696 |
| 49 | C | -4.051519 | 4.447669  | -0.898875 | 49 | C | -3.808029 | 4.651350  | -0.840260 |
| 50 | H | -2.583768 | 4.572536  | 1.424255  | 50 | H | -2.308760 | 4.641512  | 1.476320  |
| 51 | H | -0.973448 | 4.653229  | 0.684458  | 51 | H | -0.702643 | 4.615363  | 0.717935  |
| 52 | H | -2.146814 | 5.961892  | 0.408460  | 52 | H | -1.787422 | 6.002922  | 0.463722  |
| 53 | H | -2.147936 | 4.123800  | -2.858532 | 53 | H | -1.937468 | 4.204691  | -2.819344 |
| 54 | H | -1.896018 | 5.701804  | -2.083584 | 54 | H | -1.571941 | 5.750007  | -2.025238 |
| 55 | H | -0.716695 | 4.389817  | -1.846703 | 55 | H | -0.484536 | 4.356863  | -1.811261 |
| 56 | H | -4.199556 | 5.526478  | -1.028295 | 56 | H | -3.875696 | 5.739208  | -0.956003 |
| 57 | H | -4.454053 | 3.933334  | -1.777295 | 57 | H | -4.252379 | 4.178925  | -1.721592 |
| 58 | H | -4.631591 | 4.118728  | -0.030586 | 58 | H | -4.404224 | 4.355703  | 0.028457  |
| 59 | C | 4.773384  | 1.597984  | -0.564048 | 59 | C | 4.838412  | 1.458230  | -0.495580 |
| 60 | C | 4.845862  | 1.346630  | -2.070472 | 60 | C | 4.925159  | 1.239355  | -2.006379 |
| 61 | C | 4.825722  | 3.107491  | -0.285808 | 61 | C | 4.930486  | 2.958815  | -0.181566 |
| 62 | C | 5.955195  | 0.913594  | 0.136989  | 62 | C | 5.990323  | 0.724672  | 0.205361  |
| 63 | H | 4.808084  | 0.275768  | -2.296235 | 63 | H | 4.859975  | 0.175546  | -2.257622 |
| 64 | H | 4.010107  | 1.823449  | -2.592041 | 64 | H | 4.110966  | 1.751657  | -2.528434 |
| 65 | H | 5.783322  | 1.752356  | -2.469671 | 65 | H | 5.879441  | 1.626723  | -2.383339 |
| 66 | H | 4.747917  | 3.304375  | 0.788205  | 66 | H | 4.843793  | 3.132841  | 0.895744  |
| 67 | H | 5.769925  | 3.530118  | -0.651582 | 67 | H | 5.891435  | 3.362000  | -0.524886 |
| 68 | H | 4.000874  | 3.625994  | -0.787553 | 68 | H | 4.128077  | 3.512595  | -0.68217  |
| 69 | H | 6.904601  | 1.327499  | -0.224776 | 69 | H | 6.955858  | 1.118751  | -0.135209 |
| 70 | H | 5.899467  | 1.061458  | 1.220038  | 70 | H | 5.924343  | 0.850624  | 1.290606  |
| 71 | H | 5.956342  | -0.164896 | -0.060072 | 71 | H | 5.963239  | -0.348854 | -0.015154 |

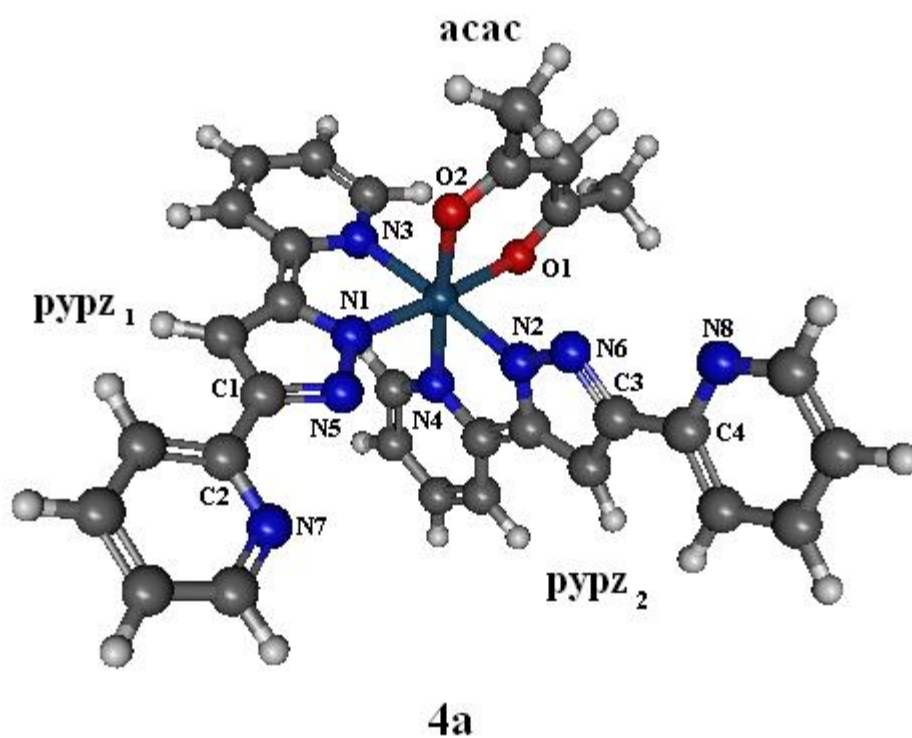

**Figures S1.** Optimized structures of complex **4a** in the ground state at DFT/PBE0/LANL2DZ level.
